# Supplementary material for: Lipophilic ferulic acid derivatives protect PC12 cells against oxidative damage via modulating β-amyloid aggregation and activating Nrf2 enzymes
Source: Royal Society of Chemistry journal article supplement (doi:10.1039/d0fo00800a), 2020-01-01
Supplement: d0fo00800a1.pdf [file d0fo00800a1.pdf]

**SUPPORTING INFORMATION (SI)**

**Lipophilic ferulic acid derivatives protect PC12 cells against oxidative  
damage via modulating  $\beta$ -Amyloid aggregation and activating Nrf2  
enzymes**

Yu Wu,<sup>†a</sup> Yu-gang Shi,<sup>†\*a</sup> Xiao-liang Zheng,<sup>b</sup> Ya-li Dang,<sup>c</sup> Chen-min Zhu,<sup>a</sup> Run-run  
Zhang,<sup>a</sup> Yu-ying Fu,<sup>a</sup> Tian-yi Zhou,<sup>b</sup> Jun-hui Li<sup>d</sup>

*<sup>a</sup>School of Food Science and Biotechnology, Zhejiang Gongshang University, Hangzhou,  
Zhejiang 310035, China*

*<sup>b</sup>Center for Molecular Medicine, Zhejiang Academy of Medical Sciences, Hangzhou  
310013, China; Hangzhou*

*<sup>c</sup>Key Laboratory of Animal Protein Food Processing Technology of Zhejiang Province,  
Ningbo University, Ningbo 315211, China*

*<sup>d</sup>Zhejiang Key Laboratory for Agro-Food Processing, Department of Food Science and  
Nutrition, Zhejiang University, Hangzhou 310058, China*

**\*Corresponding Author:**

*Dr. Yu-gang Shi*

*School of Food Science and Biotechnology, Zhejiang Gongshang University, Xiasha University Town,  
Xuezheng Str. 18, Hangzhou 310018, China*

*Tel.: 86-0571-28008927*

### **General conditions for the alcoholysis to prepare FAEs**

Ferulate esters with different direct chain fatty alcohols (1-butanol, 1-hexanol, 1-octanol, 1-decanol, and 1-laurinol) were synthesized as described by Shi et al (2017, 2018). The alcoholysis reactions of MF with these fatty alcohols were conducted in a 30 mL glass vial equipped with a tight screw-cap. MF and fatty alcohols (molar ratio, 1:6) were added to 10 mL DES with water (10%, w/w). The reaction was initiated by adding 10 mg of crushed CalB immo Plus. All experiments were carried out under sonochemical irradiation of 150 W, at 50 °C, for an hour, and subsequently, the reaction bottles were incubated in an orbital shaker at 200 rpm at 60 °C up to 7 days. The supernatants were analyzed by TLC on Silica gel 60F254 aluminum sheets (0.2 mm thickness, Merck) and high-performance liquid chromatography (HPLC) using a Waters pump (Waters 1525). The conversion of MF into products was calculated as the area percentage of the product peak against the total areas of the substrate (MF) and product peaks. After the completion of the reaction, any solid including lipase was removed by centrifugation and lipase was washed thoroughly with hexane for the reuse. Evaporation of the solvent gave a product mixture, which was separated by silica gel column chromatography using hexane/ethyl acetate (96:4, v/v) as the eluent and/or crystallization

### **HPLC analysis**

HPLC conditions were as follows: Welchrom-C18 column (250 mm×4.6 mm, 5 μm particle size, Welch Materials, MD, USA), equipped with an auto-sampler (model G7129A), and an ultraviolet diode-array (UV-DAD) detector (UV6000LP), Methanol-

phosphoric acid 3 mM (95: 5) as mobile phase (flowrate: 0.75 mL/min), and column temperature of 35 °C. Peak integration was then performed by using ChemStation Edition software (LC-02).

### **Cell Viability Assay**

Cell viability was assessed by measuring the metabolism of MTT. Briefly, cells were plated in 96-well cell culture plates in 100  $\mu$ L ( $1 \times 10^4$  cells/well) and pretreated with various concentrations of FA and its alkyl esters (10, 50, and 100  $\mu$ mol/L) for 24 h. Thereafter, to each well was added MTT solution (20  $\mu$ L/well) with the final concentration of 5 mg/mL. After 4 h at 37 °C, the supernatant was discarded and MTT crystals were dissolved in 150  $\mu$ L of dimethyl sulfoxide. The absorbance of samples was measured at 490 nm with a multimode microplate reader (Synergy2, Bio-Tek, WI, USA). For relative quantification, the value of absorbance in each group was normalized to that in the control group.

### **$A\beta_{1-42}$ Aggregation Inhibition Activity Assay**

The  $A\beta_{1-42}$  aggregation inhibition assay was carried out based on the thioflavin T fluorescence method with some modification (Li et al., 2017).  $A\beta_{1-42}$  stock solution (1 mM, dissolved in DMSO) was incubated in an ultrasonic bath for 30 min and diluted with phosphate buffer saline (10 mM, pH 7.4). Then the peptide solution (final  $A\beta$  concentration of 40  $\mu$ M) was incubated at 37 °C for 72 h with test compounds (in 1  $\mu$ M, 5  $\mu$ M, 10  $\mu$ M, 50  $\mu$ M, and 100  $\mu$ M concentration). Afterward, 80  $\mu$ L of test solution was diluted to 600  $\mu$ L with a phosphate buffer containing 10  $\mu$ M thioflavin T, the fluorescence intensity against the blank (10  $\mu$ M thioflavin T solution) was recorded. Then,

the fluorescence intensity was performed with multimode microplate reader (SpectraMax M4, Molecular Devices, Sunnyvale, CA, USA) ( $\lambda_{exc}=450$  nm/ $\lambda_{em}=485$  nm). Aggregation inhibition attributed to the presence of the extract was calculated with the following formula:

$$A\beta_{1-42} \text{ aggregation inhibition (\%)} = (1 - IF_i / IF_c) \times 100$$

Where  $IF_i$  and  $IF_c$  are the fluorescence intensities measured for  $A\beta_{1-42}$  in the presence and absence of the inhibitors, respectively.

#### **References:**

- Li, Q.; Tu, Y.; Zhu, C.; Luo, W.; Huang, W.; Liu, W.; Li, Y. Cholinesterase,  $\beta$ -amyloid aggregation inhibitory and antioxidant capacities of chinese medicinal plants. *Ind. Crop. Prod.* **2017**, *108*, 512–519.
- Shi, Y. G.; Zhu, Y. J.; Shao, S. Y.; Zhang, R. R.; Wu, Y.; Zhu, C. M.; Liang, X. R.; Cai, W. Q. Alkyl ferulate esters as multi-functional food additives: Antibacterial activity and mode of action against *Escherichia coli* in vitro. *J. Agr. Food Chem.* **2018**, *66*(45), 12088–12101.
- Shi, Y. G.; Wu, Y.; Lu, X. Y.; Ren Y. P.; Wang, Q.; Zhu, C. M.; Yu, D.; Wang, H. Lipase-catalyzed esterification of ferulic acid with lauryl alcohol in ionic liquids and antibacterial properties in vitro against three food-related bacteria. *Food Chem.* **2017**, *220*, 249–256.

Shi et al.

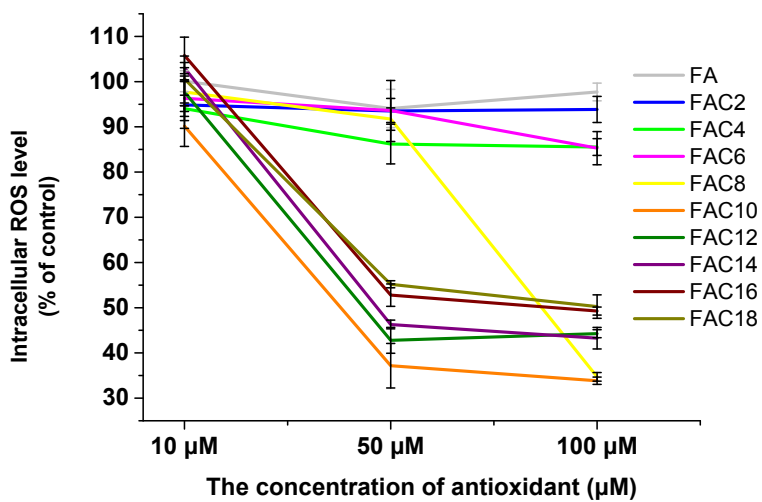

**Figure 1S.** Influence of a 24 h treatment with FA and its alkyl esters on ROS level in PC12 cells. Cells were pretreated with 10, 50 and 100 µM phenolic compound or 0.1% (v/v) ethanol (control cells) during 24 h. ROS level was assessed using DCF fluorescence using a microplate reader ( $\lambda_{\text{ex}}$ : 485 nm/ $\lambda_{\text{em}}$ : 525 nm). Results are expressed as mean  $\pm$  SD (n=3).

---

**FA**

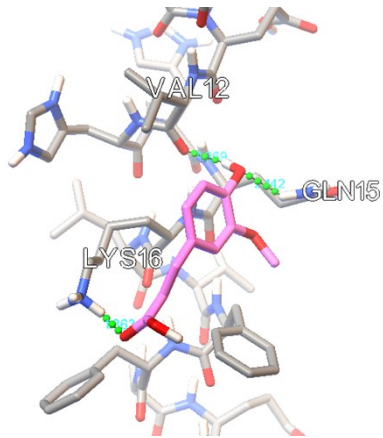

**FAC2**

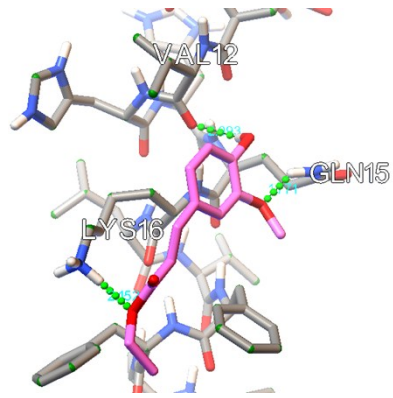

---

**FAC4**

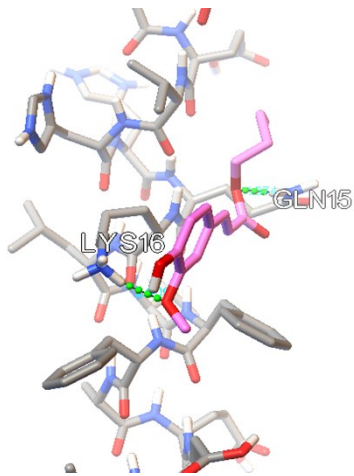

**FAC6**

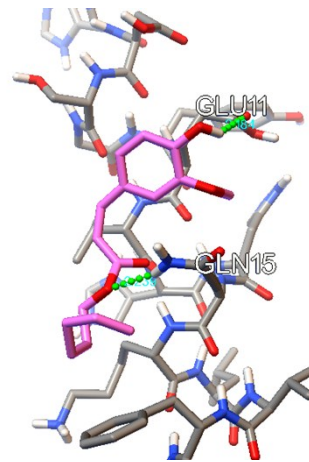

---

**FAC8**

**FAC10**

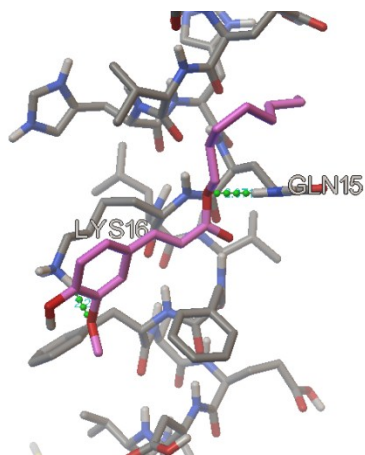

---

**FAC12**

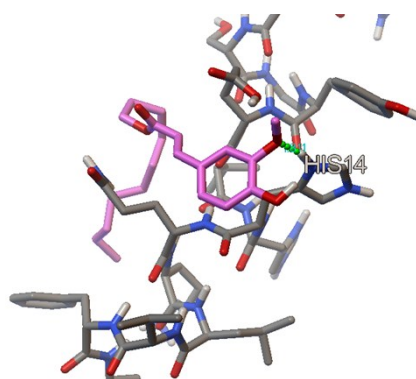

---

**FAC14**

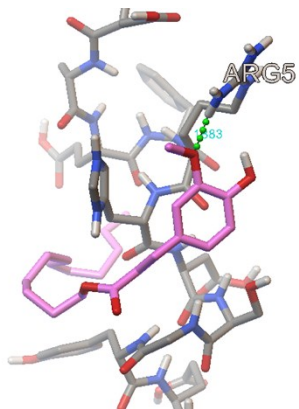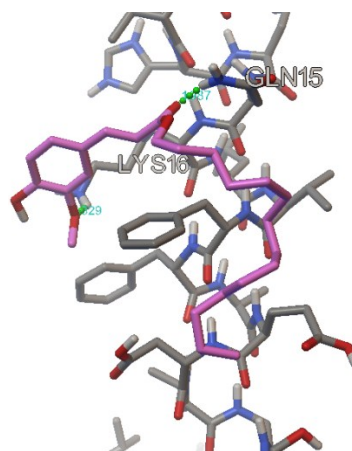

---

**Figure 2S.** Docking model between  $A\beta_{1-42}$  monomer and FAEs calculated by AutoDock.

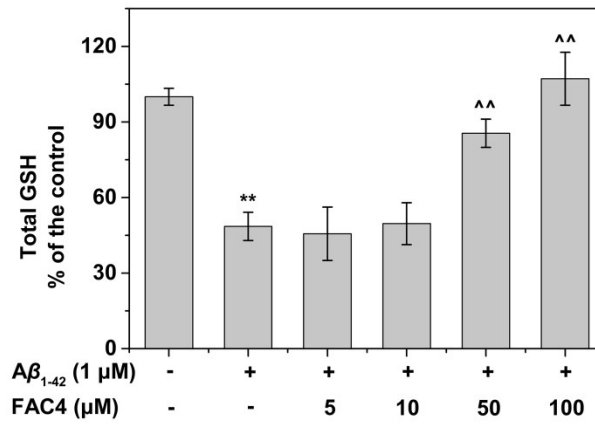

**Fig. 3S.** Effect of FAC4 upon GSH content in PC12 cells. PC12 cells were seeded in 6-well plates ( $5 \times 10^5$  cells per well) for 1 day and subsequently treated with indicated concentrations of  $A\beta_{1-42}$  and FAC4 for another 24 h. Then, the cells were collected and detected as described in the Methods. All data represent the means  $\pm$  SD of three independent experiments. \*,  $P < 0.05$ , \*\*,  $P < 0.01$  vs the control group; ^,  $P < 0.05$ , and ^^,  $P < 0.01$  the  $A\beta_{1-42}$ -treated group.



[Table 1S. Structural properties and binding interactions of FA and FAEs into the A $\beta$ <sub>1-42</sub> active site calculated by the docking study.]

| 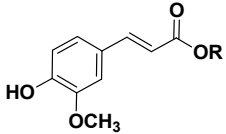 | R                              | miLogP <sup>a</sup>           | cLogP <sup>b</sup> | $\Delta G_b$ (Kcal/mol) | K <sub>i</sub> ( $\mu$ M) | Atom of the ligand | Amino acid         |       |
|-----------------------------------------------------------------------------------|--------------------------------|-------------------------------|--------------------|-------------------------|---------------------------|--------------------|--------------------|-------|
| <b>Ferulic acid</b>                                                               | <b>FA</b>                      | H                             | 1.25               | 1.4212                  | -4.5                      | 503.96             | 4-OH               | VAL12 |
|                                                                                   |                                |                               |                    |                         |                           |                    | 4-OH               | GLN15 |
|                                                                                   |                                |                               |                    |                         |                           |                    | C=O                | LYS16 |
| <b>Ferulic alkyl esters</b>                                                       | <b>FAC2</b>                    | C <sub>2</sub> H <sub>5</sub> | 2.24               | 2.1762                  | -4.23                     | 791.78             | 4-OH               | VAL12 |
|                                                                                   |                                |                               |                    |                         |                           |                    | 3-OCH <sub>3</sub> | GLN15 |
|                                                                                   |                                |                               |                    |                         |                           |                    | C-O-C              | LYS16 |
|                                                                                   | <b>FAC4</b>                    | C <sub>4</sub> H <sub>9</sub> | 3.30               | 3.2342                  | -3.95                     | 1.28 mM            | C-O-C              | GLN15 |
|                                                                                   |                                |                               |                    |                         |                           |                    | 3-OCH <sub>3</sub> | LYS16 |
|                                                                                   |                                |                               |                    |                         |                           |                    | 4-OH               | GLU11 |
| <b>FAC6</b>                                                                       | C <sub>6</sub> H <sub>13</sub> | 4.31                          | 4.2922             | -3.65                   | 2.11 mM                   | C-O-C              | GLN15              |       |
|                                                                                   |                                |                               |                    |                         |                           | C-O-C              | GLN15              |       |
| <b>FAC8</b>                                                                       | C <sub>8</sub> H <sub>17</sub> | 5.32                          | 5.3502             | -3.86                   | 1.49 mM                   | C-O-C              | GLN15              |       |
|                                                                                   |                                |                               |                    |                         |                           | 3-OCH <sub>3</sub> | LYS16              |       |

|               |                                 |      |         |       |          |                           |                |
|---------------|---------------------------------|------|---------|-------|----------|---------------------------|----------------|
| <b>FAC10</b>  | C <sub>10</sub> H <sub>21</sub> | 6.33 | 6.4082  | -3.41 | 3.15 mM  | 3-OCH <sub>3</sub>        | HIS14          |
| <b>FAC12</b>  | C <sub>12</sub> H <sub>25</sub> | 7.34 | 7.4662  | -3.44 | 3.01 mM  | 3-OCH <sub>3</sub>        | ARG5           |
| <b>FAC 14</b> | C <sub>14</sub> H <sub>27</sub> | 8.30 | 8.5242  | -3.16 | 4.79 mM  | C=O<br>3-OCH <sub>3</sub> | GLN15<br>LYS16 |
| <b>FAC 16</b> | C <sub>16</sub> H <sub>31</sub> | 8.86 | 9.5822  | -2.34 | 19.11 mM |                           |                |
| <b>FAC 18</b> | C <sub>18</sub> H <sub>35</sub> | 9.22 | 10.6402 | -2.23 | 23.13 mM |                           |                |

<sup>a</sup>The data was determined with Molinspiration calculation software. <sup>b</sup> Theoretical estimated using ChemBioDraw Ultra 13.0 program.

NMR ( $^{13}\text{C}$  NMR), MS, and HPLC data of FAEs synthesized through biotransformation in this work have been provided here.

## FAC2

$^{13}\text{C}$  NMR (600 MHz,  $\text{CDCl}_3$ )  $\delta$  167.28 (9-C=O), 147.89 (3-C-O- $\text{CH}_3$ ), 146.74 (4-C-OH), 144.66 (7-CH=CH), 127.05 (1-C), 123.02 (6-CH), 115.66 (8-C-C=O), 114.70 (5-CH), 109.29 (2-CH), 60.37 (1'-O- $\text{CH}_2$ ), 55.9 (10- $\text{CH}_3$ -O-Ar), 14.36 (4'- $\text{CH}_3$ ).

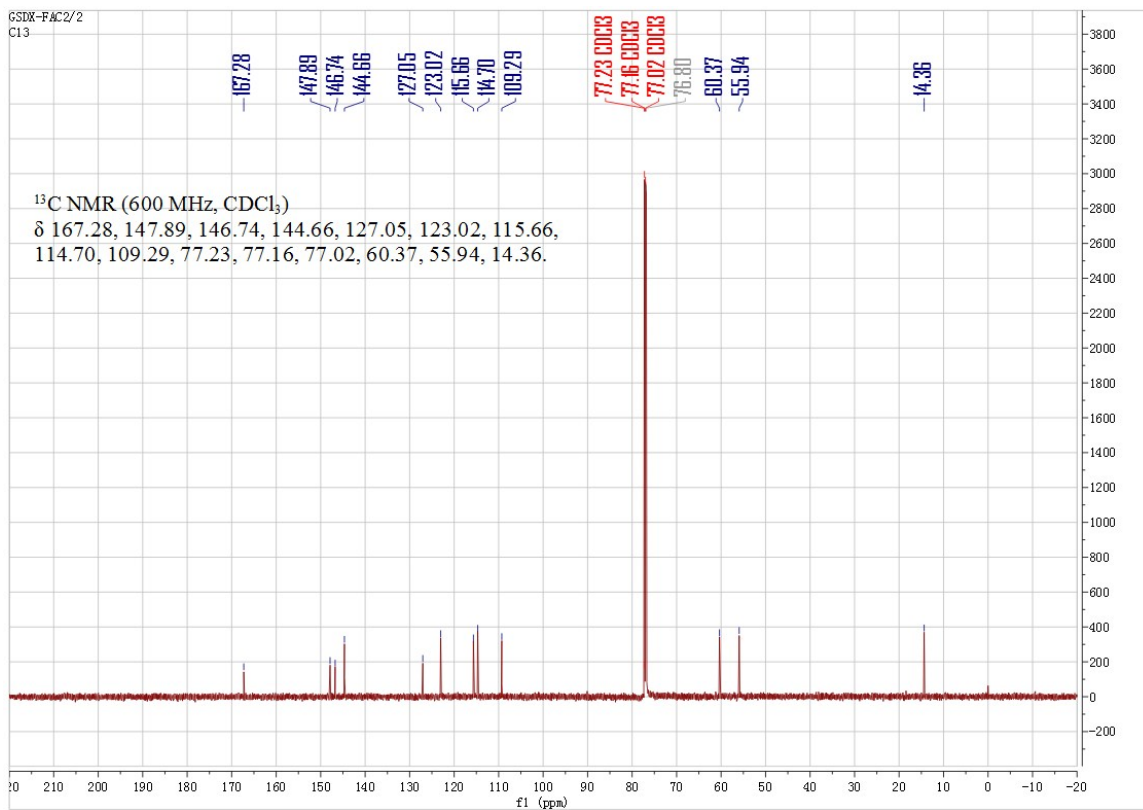

MS<sup>1</sup> (223.08)

FAC2#598 RT: 2.00 AV: 1 NL: 2.74E3  
T: ITMS + p ESI Full ms [50.00-1000.00]

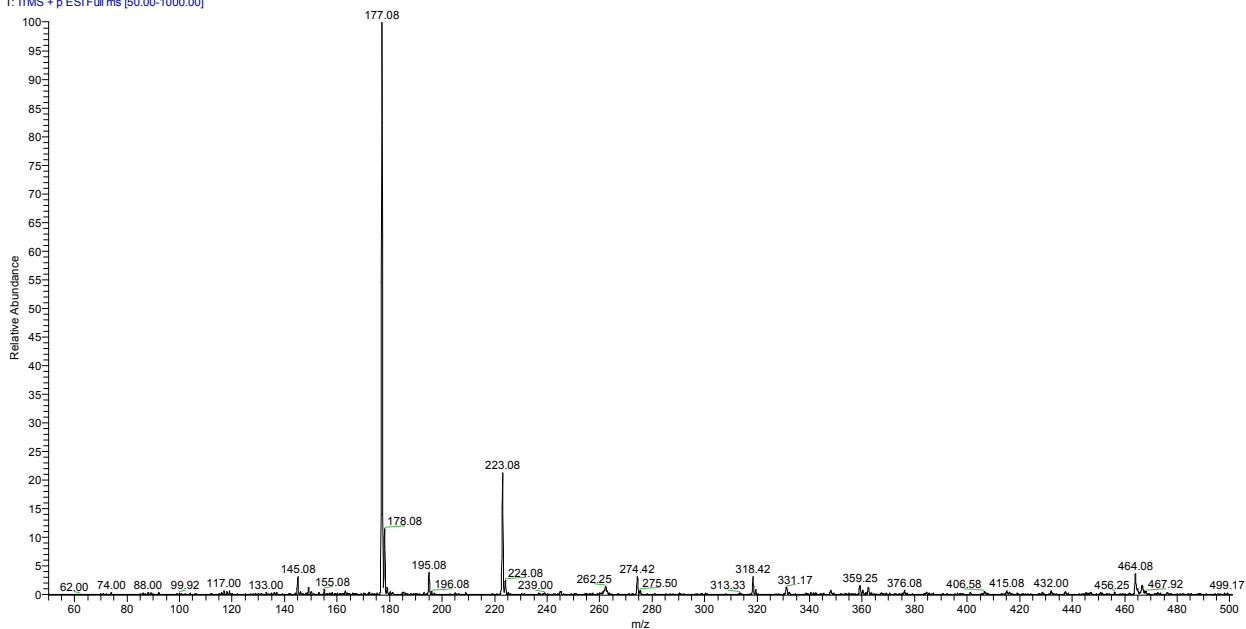

## MS<sup>2</sup> (177.08)

FAC2#757 RT: 2.79 AV: 1 NL: 4.40E2  
T: ITMS + p ESI Full ms2 223.00@cid23.00 [60.00-1000.00]

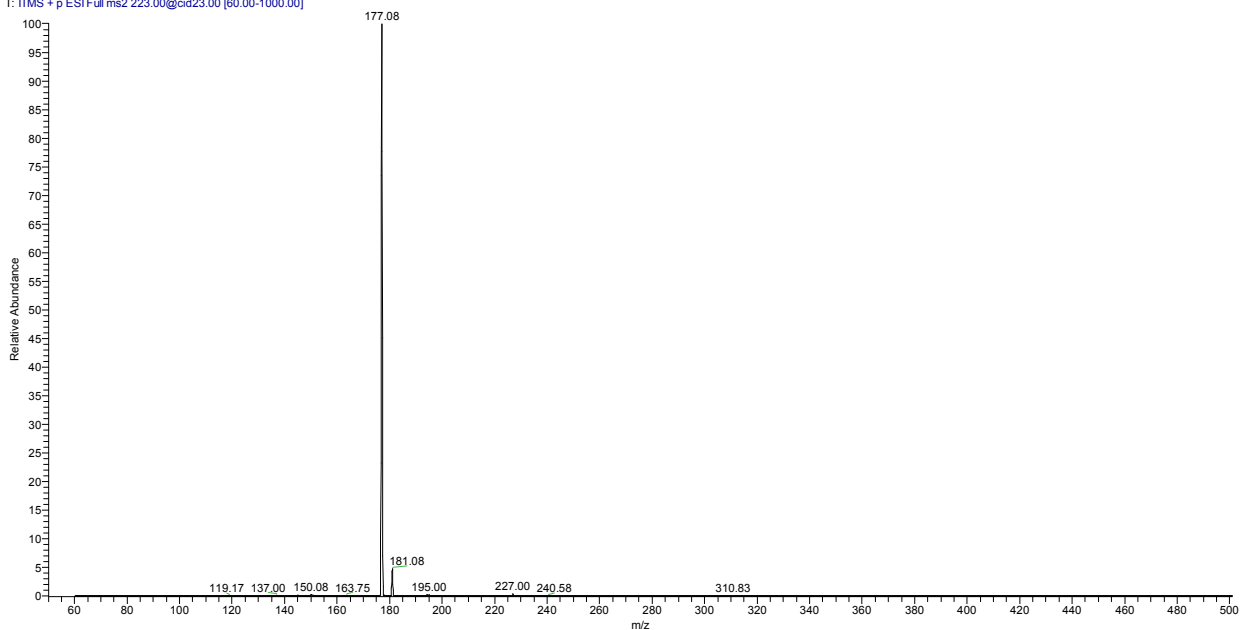

## FAC4

<sup>13</sup>C NMR (600 MHz, CDCl<sub>3</sub>)  $\delta$  167.4 (9-C=O), 147.9 (3-C-O-CH<sub>3</sub>), 146.7 (4-C-OH), 144.6 (7-CH=CH), 127.0 (1-C), 123.0 (6-CH), 115.6 (8-C-C=O), 114.7 (5-CH), 109.3 (2-CH), 64.3 (1'-O-CH<sub>2</sub>), 55.9 (10-CH<sub>3</sub>-O-Ar), 30.8 (2'-CH<sub>2</sub>), 19.2 (3'-CH<sub>2</sub>), 13.7 (4'-CH<sub>3</sub>).

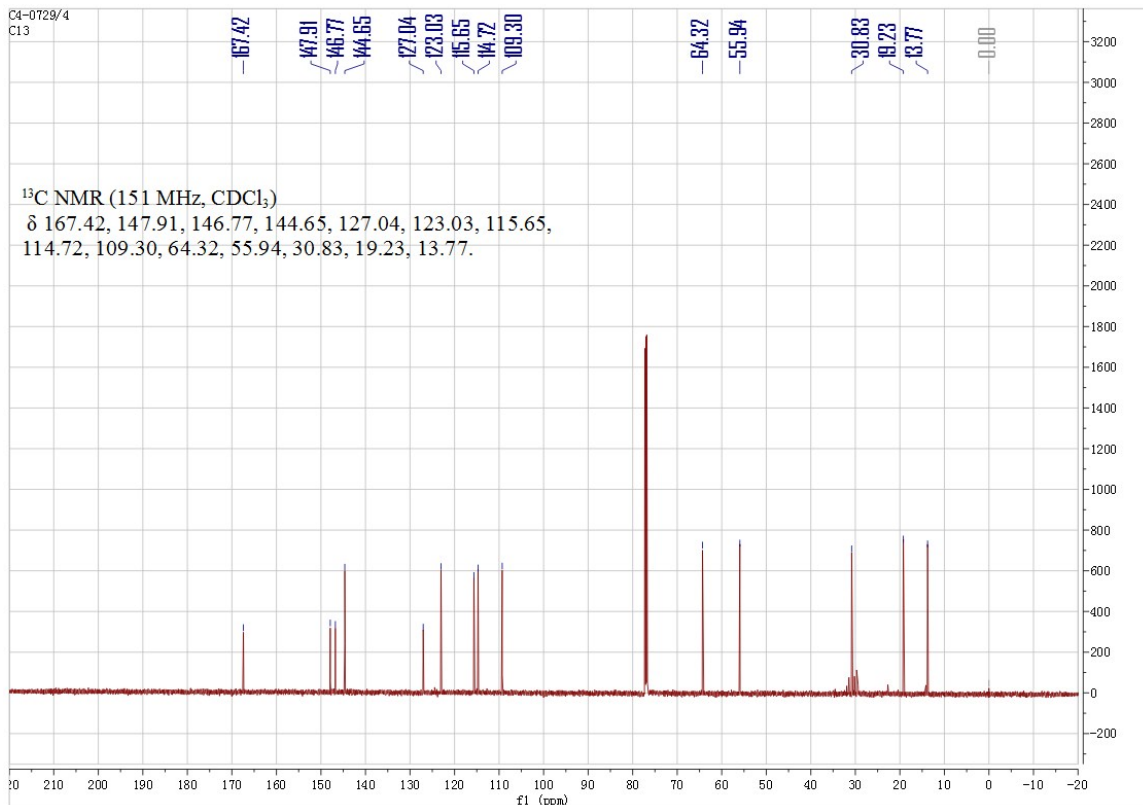

## MS<sup>1</sup> (251.00)

FAC4#125 RT: 0.40 AV: 1 NL: 1.83E2  
 T: ITMS + p ESI Full ms [60.00-1000.00]

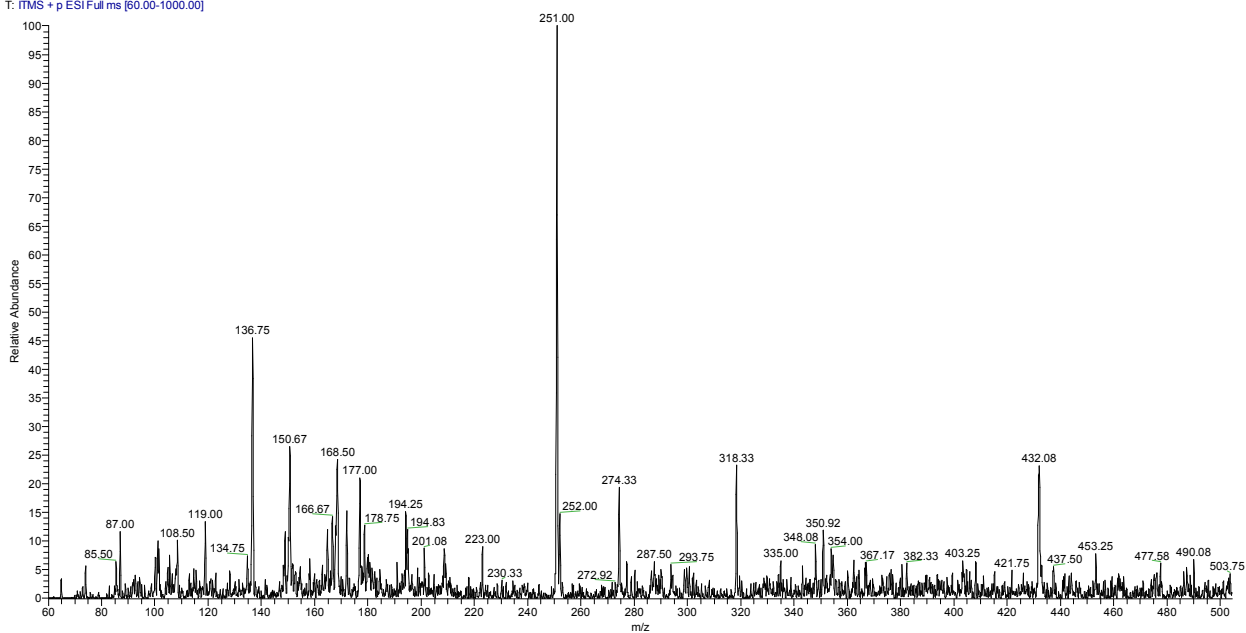

## MS<sup>2</sup> (177.08)

FAC4 #206 RT: 0.84 AV: 1 NL: 1.00E2  
T: ITMS + p ESI Full ms2 251.00@cid20.00 [65.00-1000.00]

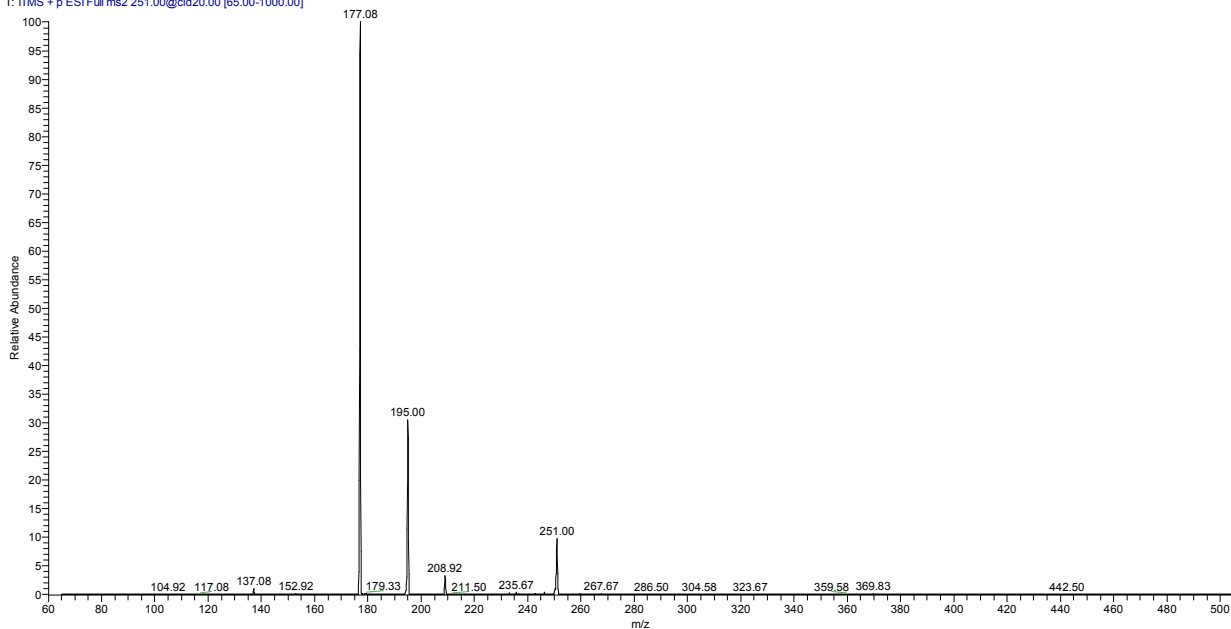

## FAC6

$^{13}\text{C}$  NMR (600 MHz,  $\text{CDCl}_3$ )  $\delta$  167.63 (9-C=O), 148.19 (3-C-O- $\text{CH}_3$ ), 147.03 (4-C-OH), 144.87 (7-CH=CH), 126.92 (1-C), 123.01 (6-CH), 115.42 (8-C-C=O), 114.97 (5-CH), 109.58 (2-CH), 64.69 (1'-O- $\text{CH}_2$ ), 55.89 (10- $\text{CH}_3$ -O-Ar), 31.51 (2'- $\text{CH}_2$ ), 28.75 (3'- $\text{CH}_2$ ), 25.69 (4'- $\text{CH}_2$ ), 22.59 (5'- $\text{CH}_2$ ), 14.04 (6'- $\text{CH}_3$ )

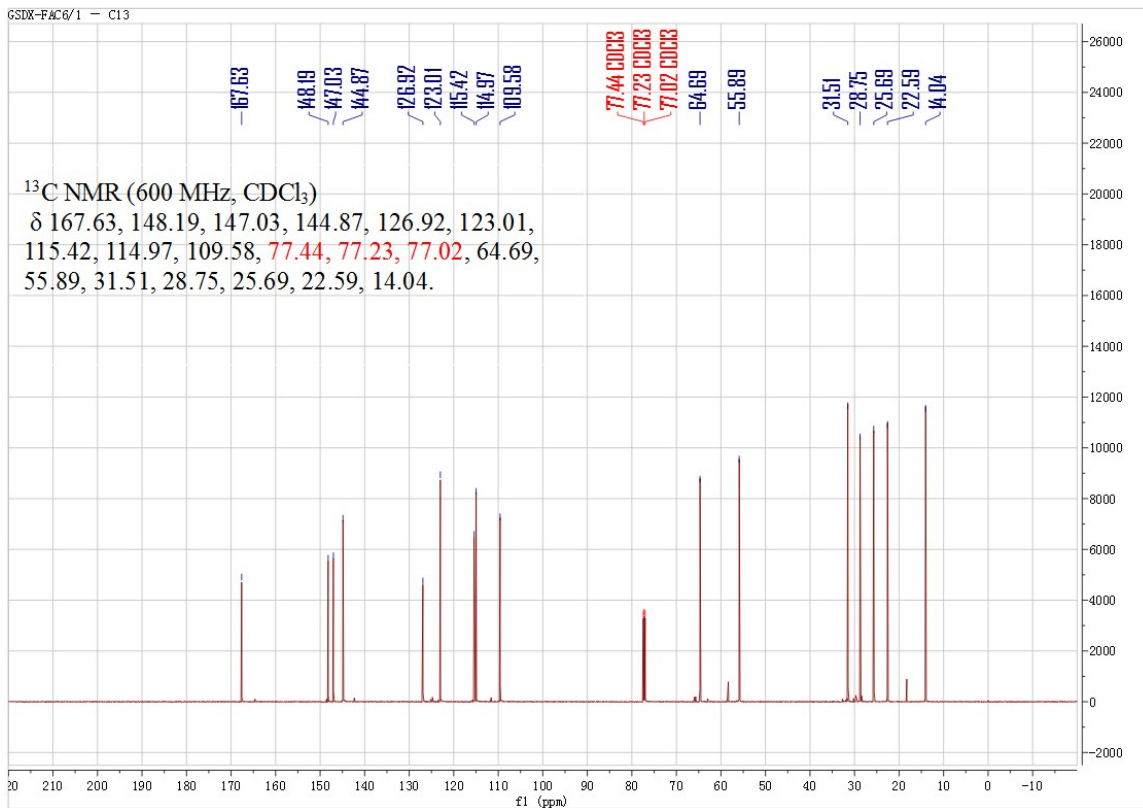

### MS<sup>1</sup> (279.08)

FAC6 #100 RT: 0.42 AV: 1 NL: 9.52E2  
 T: ITMS + p ESI Full ms [75.00-1000.00]

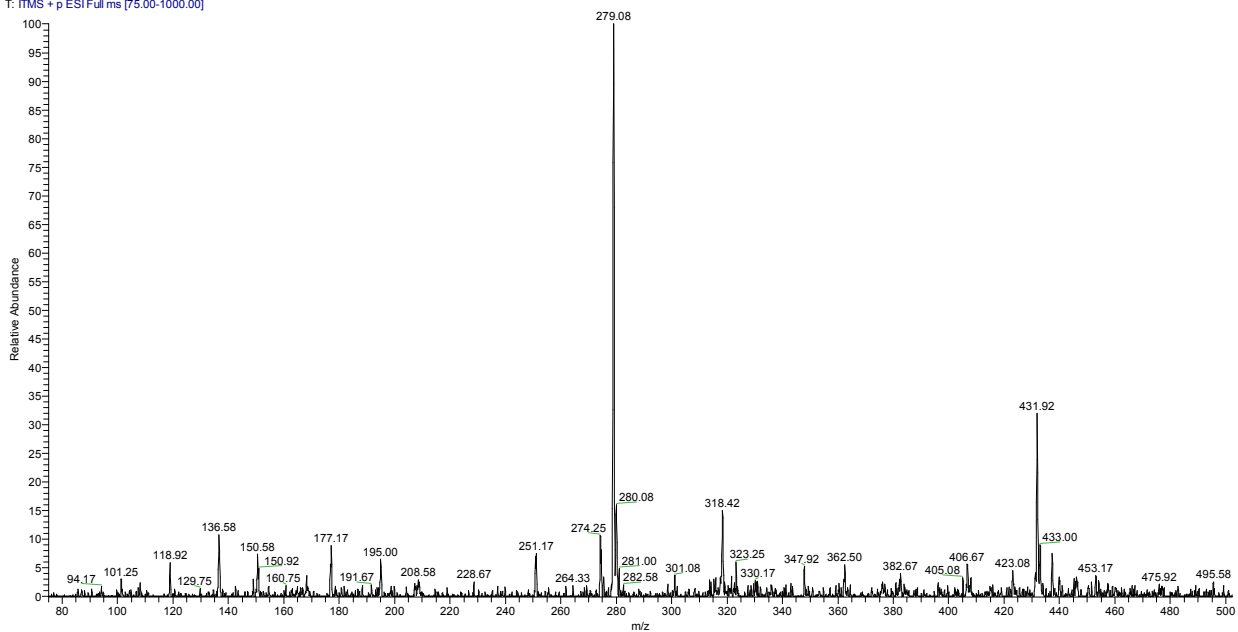

### MS<sup>2</sup> (177.00)

FAC6#68 RT: 0.24 AV: 1 NL: 1.25E2  
T: ITMS + p ESI Full ms2 279.00@cid20.00 [75.00-1000.00]

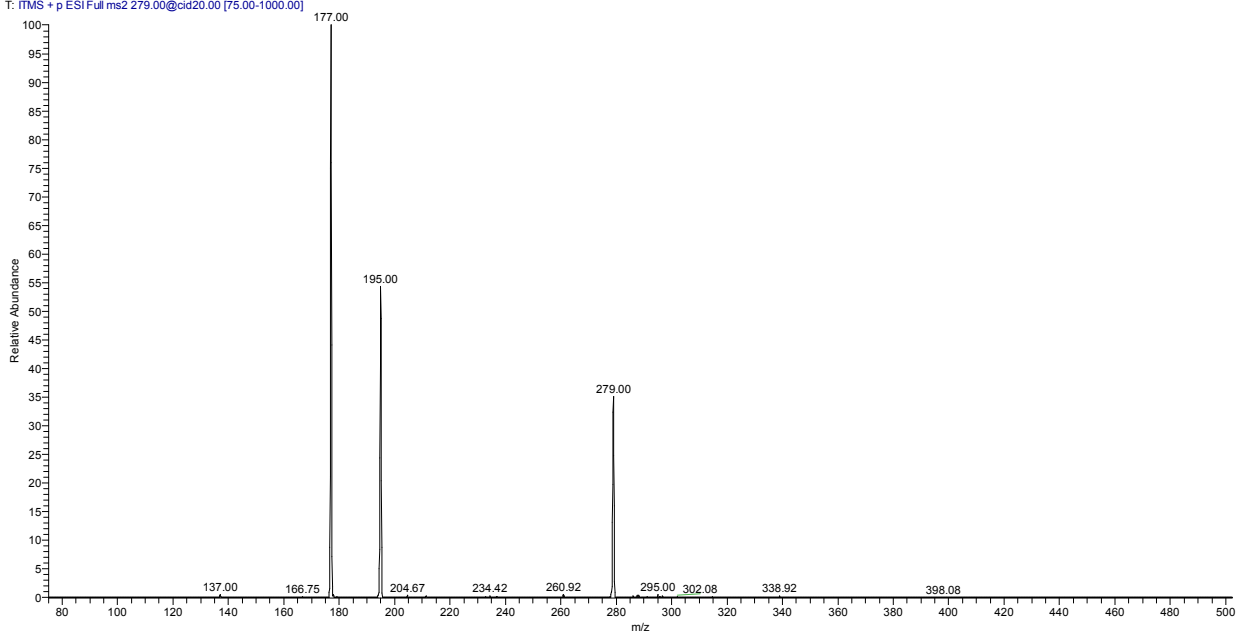

## FAC8

$^{13}\text{C}$  NMR (600 MHz,  $\text{CDCl}_3$ )  $\delta$  167.66 (9-C=O), 148.28 (3-C-O- $\text{CH}_3$ ), 147.10 (4-C-OH), 144.92 (7-CH=CH), 126.90 (1-C), 123.00 (6-CH), 115.36 (8-C-C=O), 115.04 (5-CH), 109.66 (2-CH), 64.71 (1'-O- $\text{CH}_2$ ), 55.85 (10- $\text{CH}_3$ -O-Ar), 31.85 (2'- $\text{CH}_2$ ), 29.32 (3'- $\text{CH}_2$ ), 29.26 (4'- $\text{CH}_2$ ), 28.81 (5'- $\text{CH}_2$ ), 26.05 (6'- $\text{CH}_2$ ), 22.70 (7'- $\text{CH}_2$ ), 14.12 (8'- $\text{CH}_3$ ).



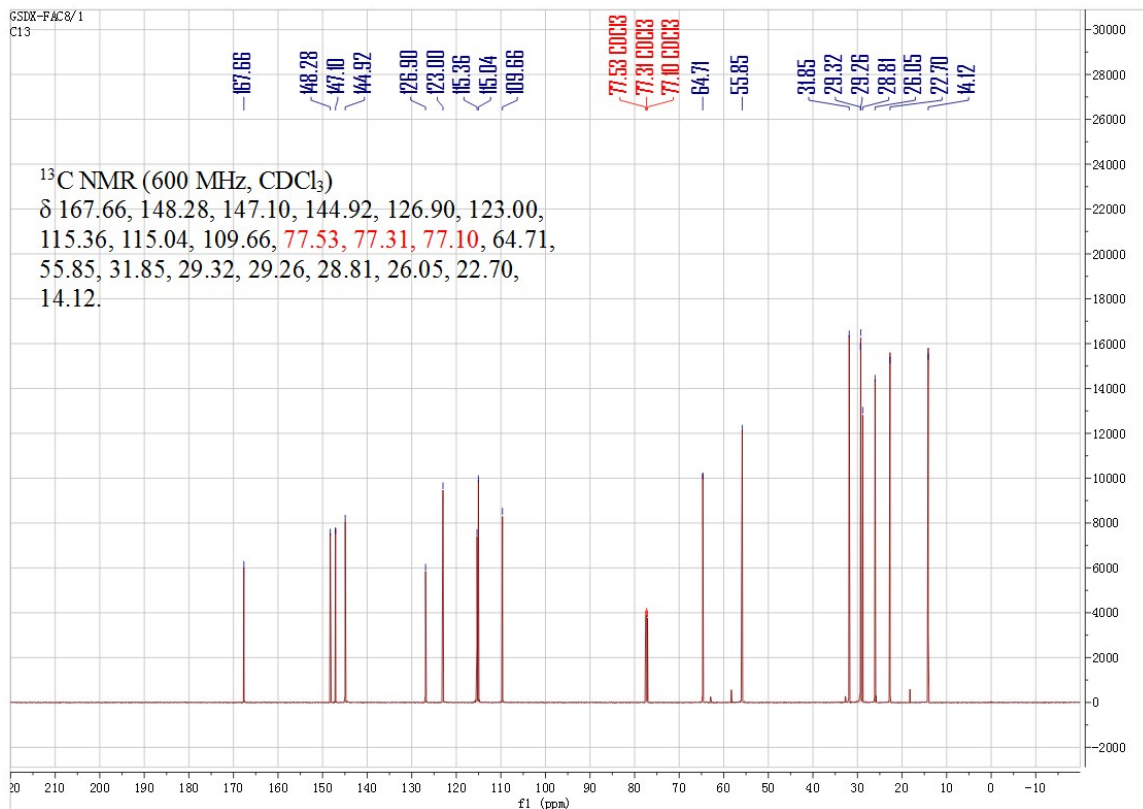

### MS<sup>1</sup> (307.40)

FAC8 #76 RT: 0.24 AV: 1 NL: 9.89E1  
 T: ITMS + p ESI Full ms [70.00-1000.00]

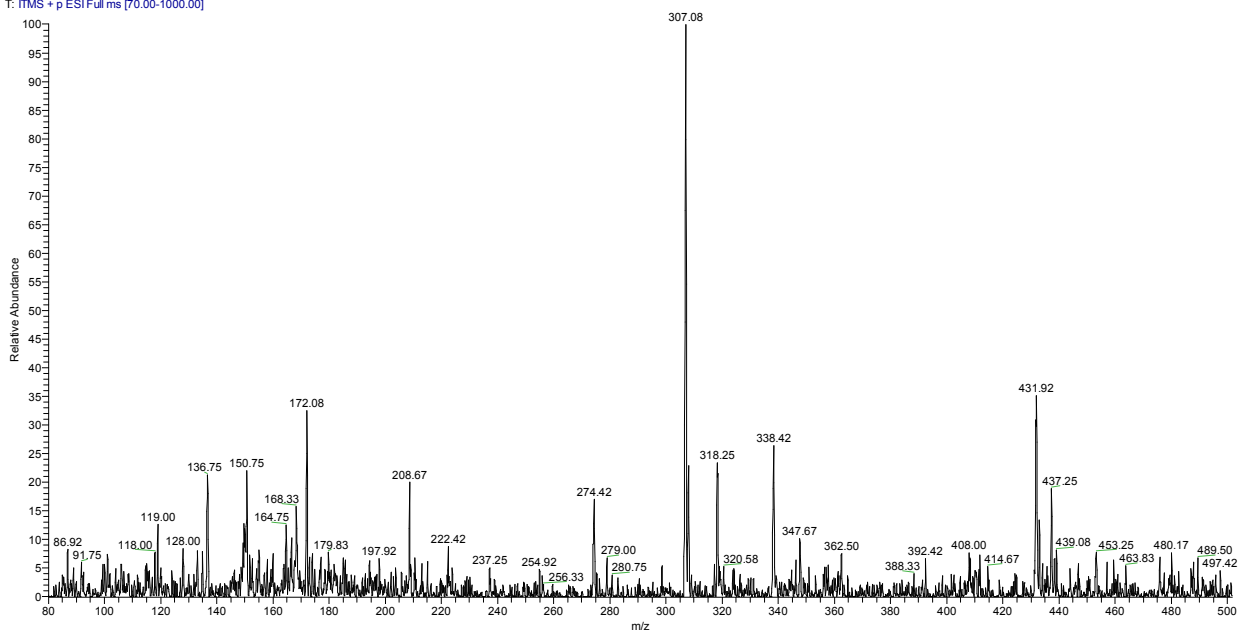

### MS<sup>2</sup> (177.00)

FAC8 #161 RT: 0.71 AV: 1 NL: 4.39E1  
T: ITMS + p ESI Full ms2 307.00@cid20.00 [80.00-1000.00]

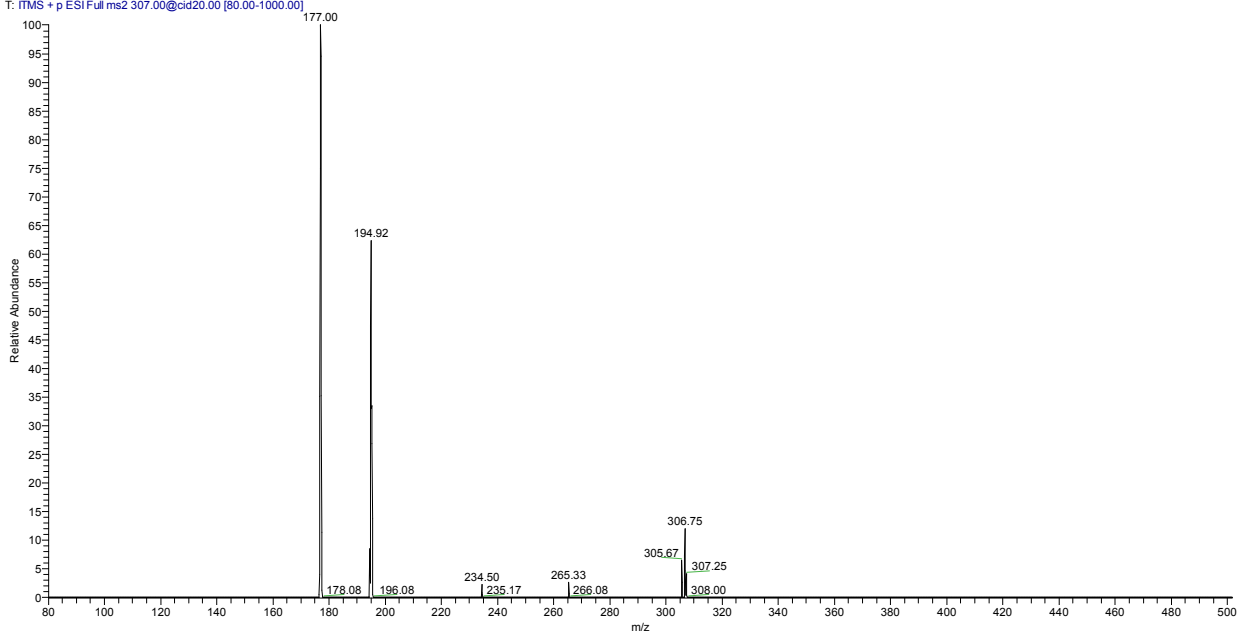

## FAC10

$^{13}\text{C}$  NMR (600 MHz,  $\text{CDCl}_3$ ):  $\delta$  167.44 (9-C=O), 147.95 (3-C-O- $\text{CH}_3$ ), 146.82 (4-C-OH), 144.67 (7-CH=CH), 127.03 (1-C), 123.04 (6-CH), 115.65 (8-C-C=O), 114.76 (5-CH), 109.36 (2-CH), 64.65 (1'-O- $\text{CH}_2$ ), 55.95 (10- $\text{CH}_3$ -O-Ar), 31.90 (2'- $\text{CH}_2$ ), 29.56 (3'- $\text{CH}_2$ ), 29.56 (4'- $\text{CH}_2$ ), 29.32 (5'- $\text{CH}_2$ ), 29.31 (6'- $\text{CH}_2$ ), 28.78 (7'- $\text{CH}_2$ ), 26.01 (8'- $\text{CH}_2$ ), 22.69 (9'- $\text{CH}_2$ ), 14.12 (10'- $\text{CH}_2$ ).

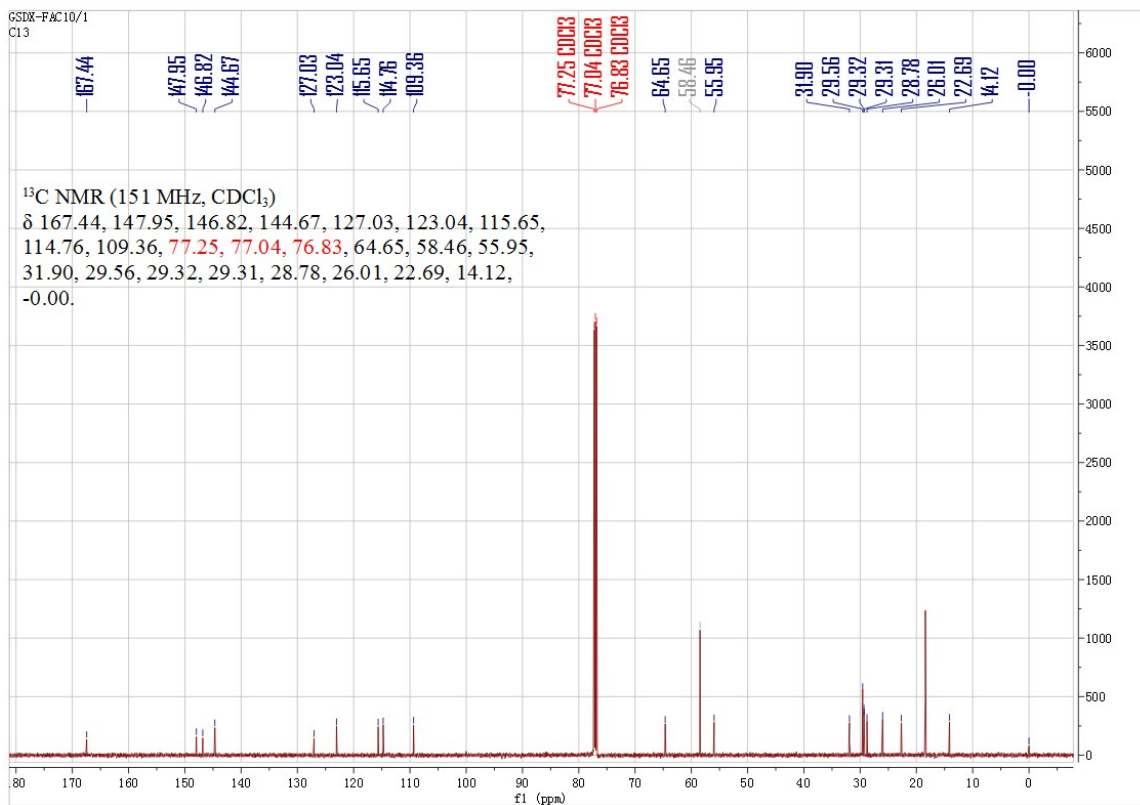

## MS<sup>1</sup> (335.45)

FAC10 #147 RT: 0.60 AV: 1 NL: 1.22E2  
 T: ITMS + p ESI Full ms [85.00-1000.00]

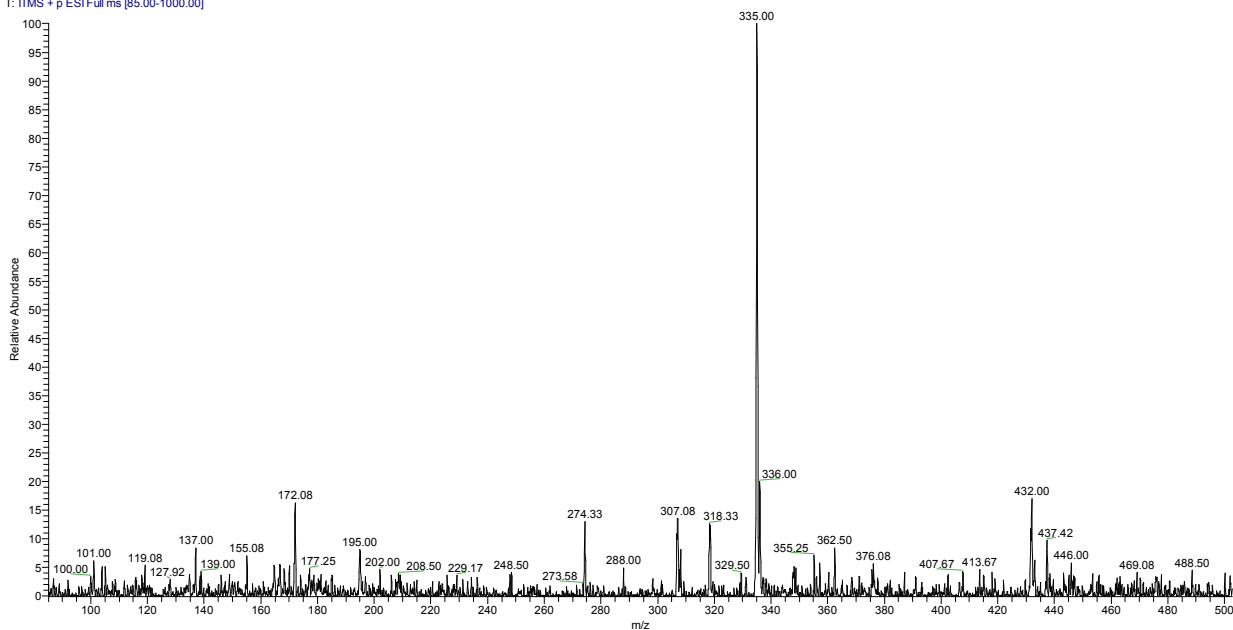

## MS<sup>2</sup> (177.00)

FAC10 #184 RT: 0.78 AV: 1 NL: 2.30  
T: ITMS + p ESI Full ms2 335.00@cid20.00 [90.00-1000.00]

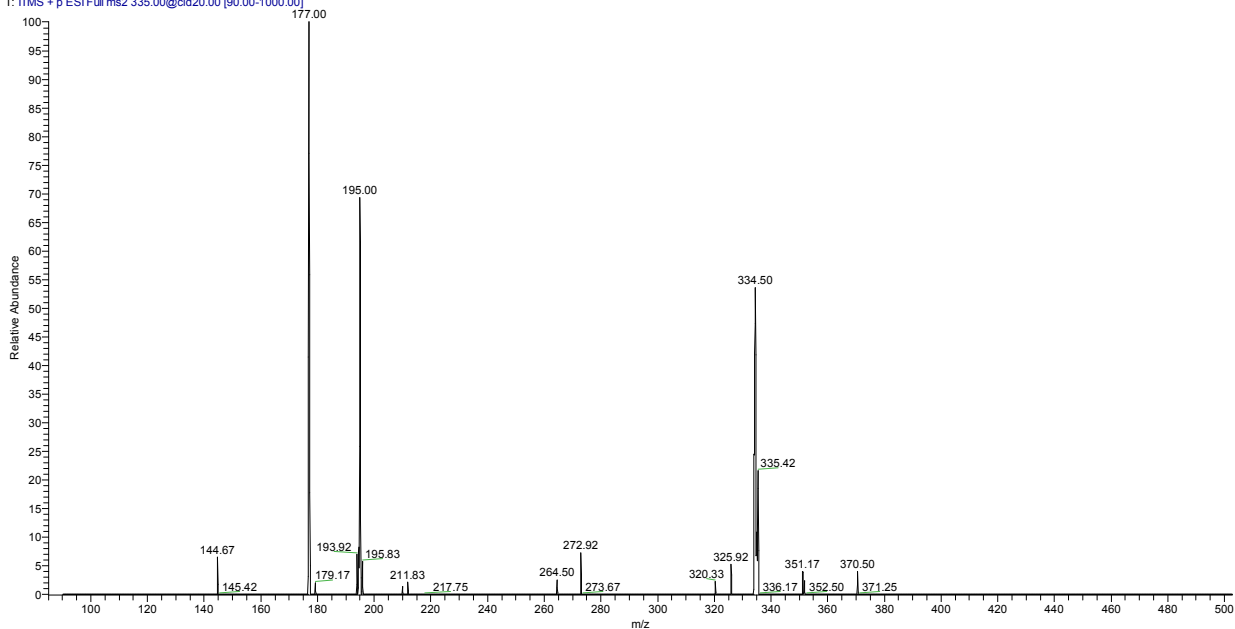

## FAC12

$^{13}\text{C}$  NMR (600 MHz,  $\text{CDCl}_3$ ): 167.49 (9-C=O), 148.02 (3-C-O- $\text{CH}_3$ ), 146.88 (4-C-OH), 144.71 (7-CH=CH), 127.01 (1-C), 123.05 (6-CH), 115.6 (8-C-C=O), 114.82 (5-CH), 109.43 (2-CH), 64.6 (1'-O- $\text{CH}_2$ ), 55.95 (10- $\text{CH}_3$ -O-Ar), 31.93 (2'- $\text{CH}_2$ ), 29.67 (3'- $\text{CH}_2$ ), 29.65 (4'- $\text{CH}_2$ ), 29.61 (5'- $\text{CH}_2$ ), 29.56 (6'- $\text{CH}_2$ ), 29.36 (7'- $\text{CH}_2$ ), 29.32 (8'- $\text{CH}_2$ ), 28.79 (9'- $\text{CH}_2$ ), 26.02 (10'- $\text{CH}_2$ ), 22.70 (11'- $\text{CH}_2$ ), 14.12 (12'- $\text{CH}_3$ ).

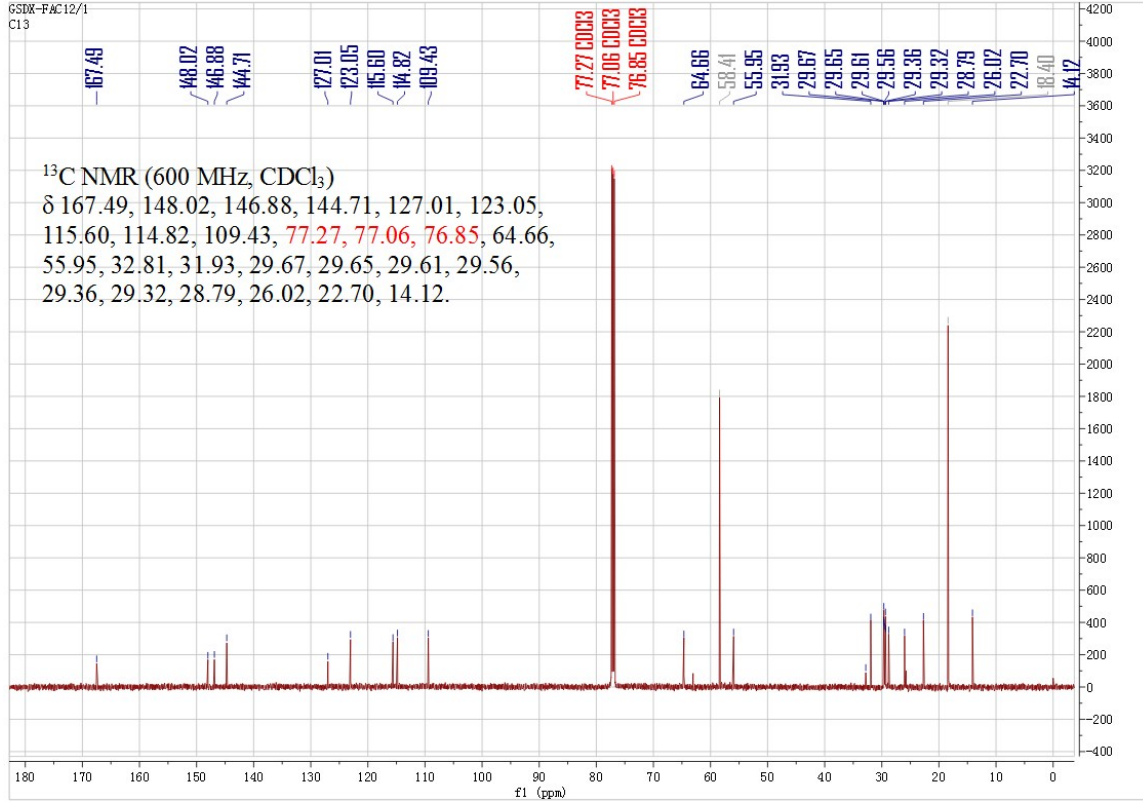

### MS<sup>1</sup> (363.08)

FAC12#89 RT: 0.41 AV: 1 NL: 1.46E2  
 T: ITMS + p ESI Full ms [95.00-1000.00]

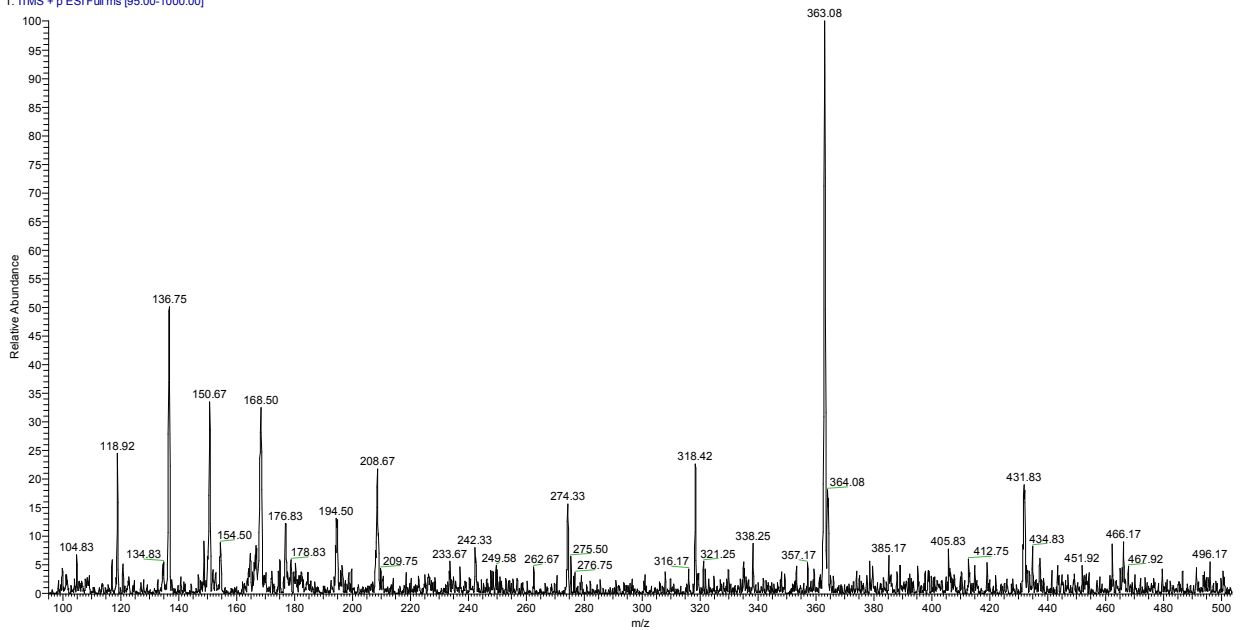

### MS<sup>2</sup> (177.00)

FAC12#111 RT: 0.52 AV: 1 NL: 1.95E1  
T: ITMS + p ESI Full ms2 363.00@cid25.00 [95.00-1000.00]

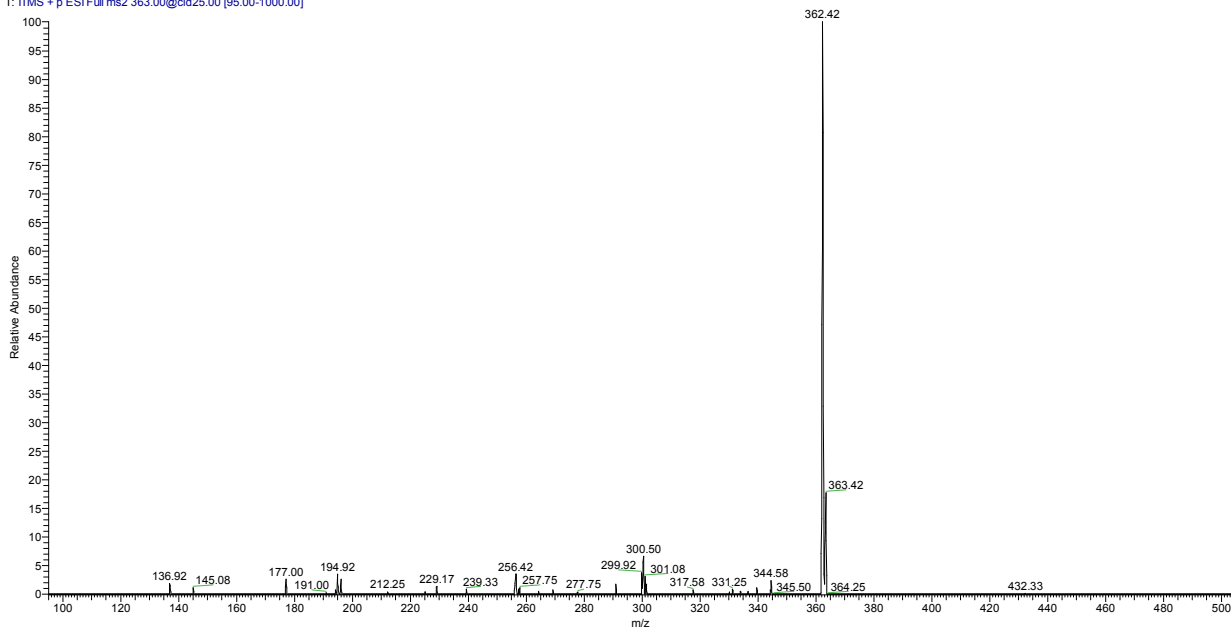

## FAC14

$^{13}\text{C}$  NMR (600 MHz,  $\text{CDCl}_3$ ): 167.38 (9-C=O), 147.88 (3-C-O- $\text{CH}_3$ ), 146.74 (4-C-OH), 144.61 (7-CH=CH), 127.06 (1-C), 123.04 (6-CH), 115.69 (8-C-C=O), 114.69 (5-CH), 109.28 (2-CH), 64.62 (1'-O- $\text{CH}_2$ ), 55.94 (10- $\text{CH}_3$ -O-Ar), 31.93 (2'- $\text{CH}_2$ ), 29.70 (3'- $\text{CH}_2$ ), 29.68 (4'- $\text{CH}_2$ ), 29.66 (5'- $\text{CH}_2$ ), 29.60 (6'- $\text{CH}_2$ ), 29.55, 29.31, 28.78, 26.01, 22.70 (7', 8', 9', 10', 11', 12', 13'- $\text{CH}_2$ ), 14.12 (14'- $\text{CH}_3$ ).

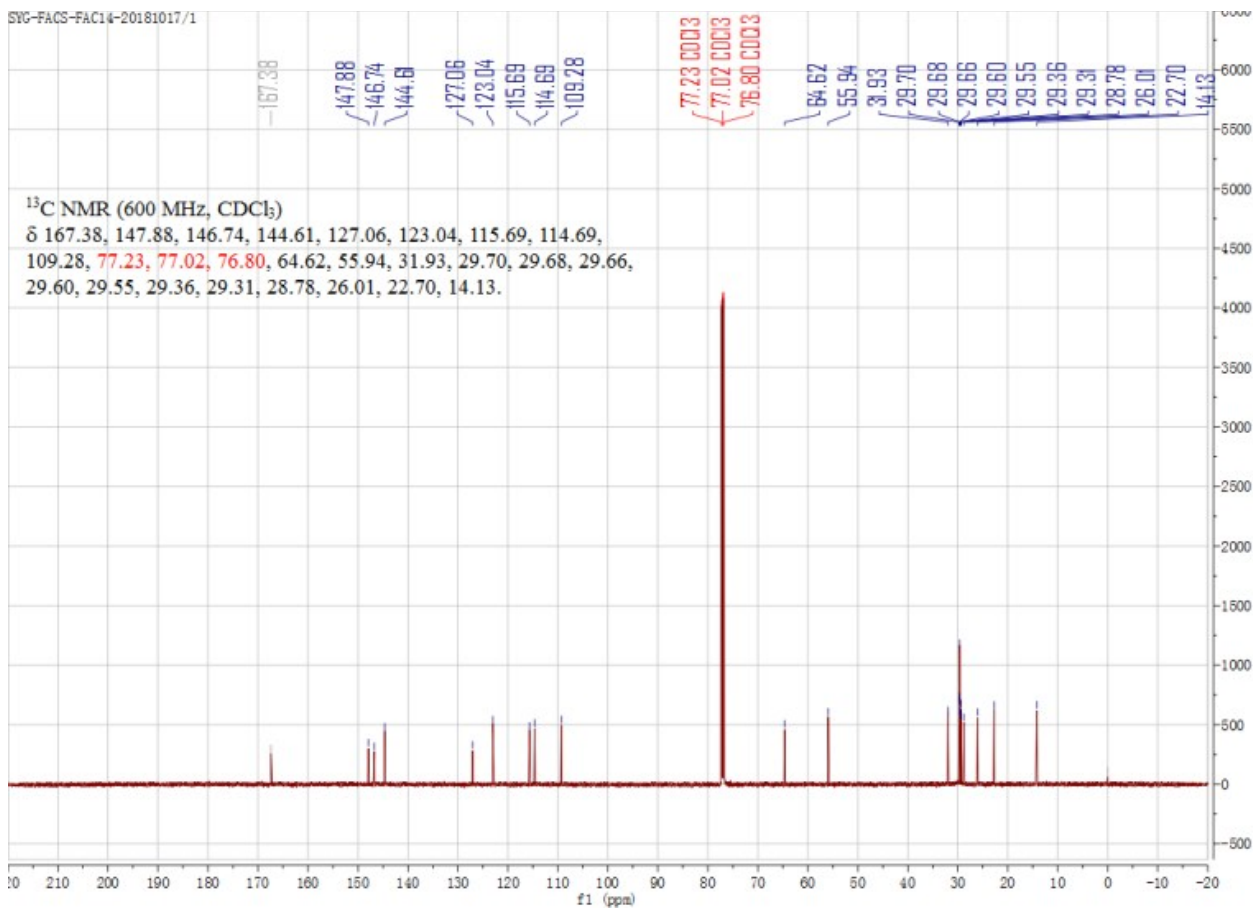

$\text{MS}^1(391.42)$

FAC14 #797 RT: 3.07 AV: 1 NL: 2.22E3  
T: ITMS - p ESI Full ms [105.00-1000.00]

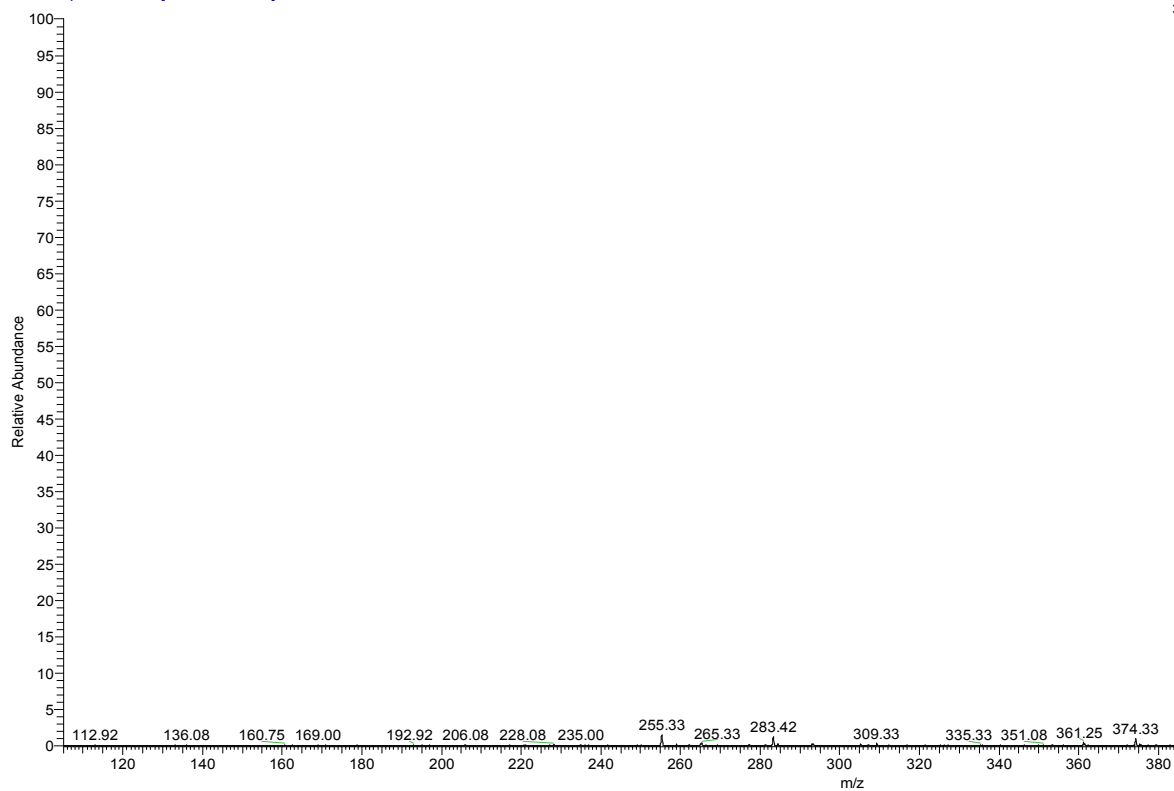

MS<sup>2</sup>



FAC14 #865 RT: 3.34 AV: 1 NL: 1.10E3  
T: ITMS - p ESI Full ms2 389.00@cid30.00 [105.00-1000.00]

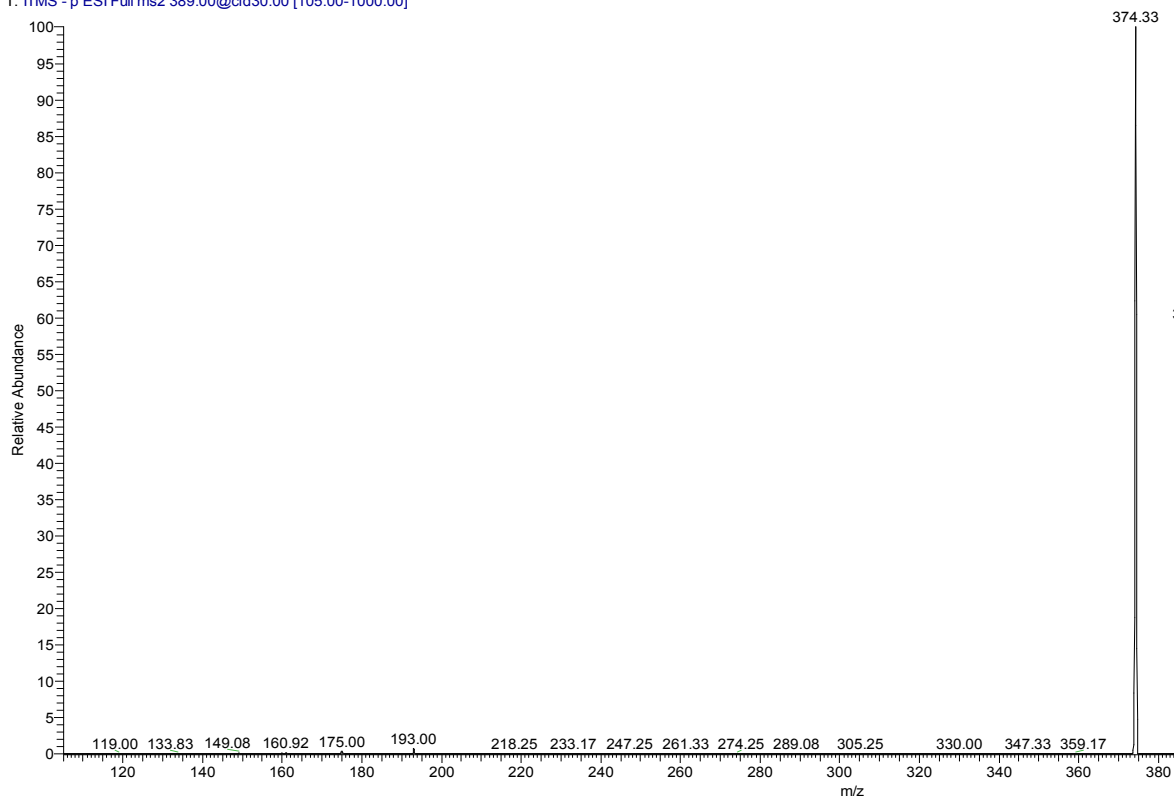

## FAC16

$^{13}\text{C}$  NMR (600 MHz,  $\text{CDCl}_3$ ): 167.38 (9-C=O), 147.88 (3-C-O- $\text{CH}_3$ ), 146.74 (4-C-OH), 144.61 (7-CH=CH), 127.06 (1-C), 123.04 (6-CH), 115.69 (8-C-C=O), 114.69 (5-CH), 109.28 (2-CH), 64.62 (1'-O- $\text{CH}_2$ ), 55.94 (10- $\text{CH}_3$ -O-Ar), 31.93 (2'- $\text{CH}_2$ ), 29.70 (3'- $\text{CH}_2$ ), 29.66 (4'- $\text{CH}_2$ ), 29.61 (5'- $\text{CH}_2$ ), 29.56 (6'- $\text{CH}_2$ ), 29.37, 29.32, 28.79, 26.01, 22.70 (7', 8', 9', 10', 11', 12', 13', 14', 15'- $\text{CH}_2$ ), 14.12 (16'- $\text{CH}_3$ ).

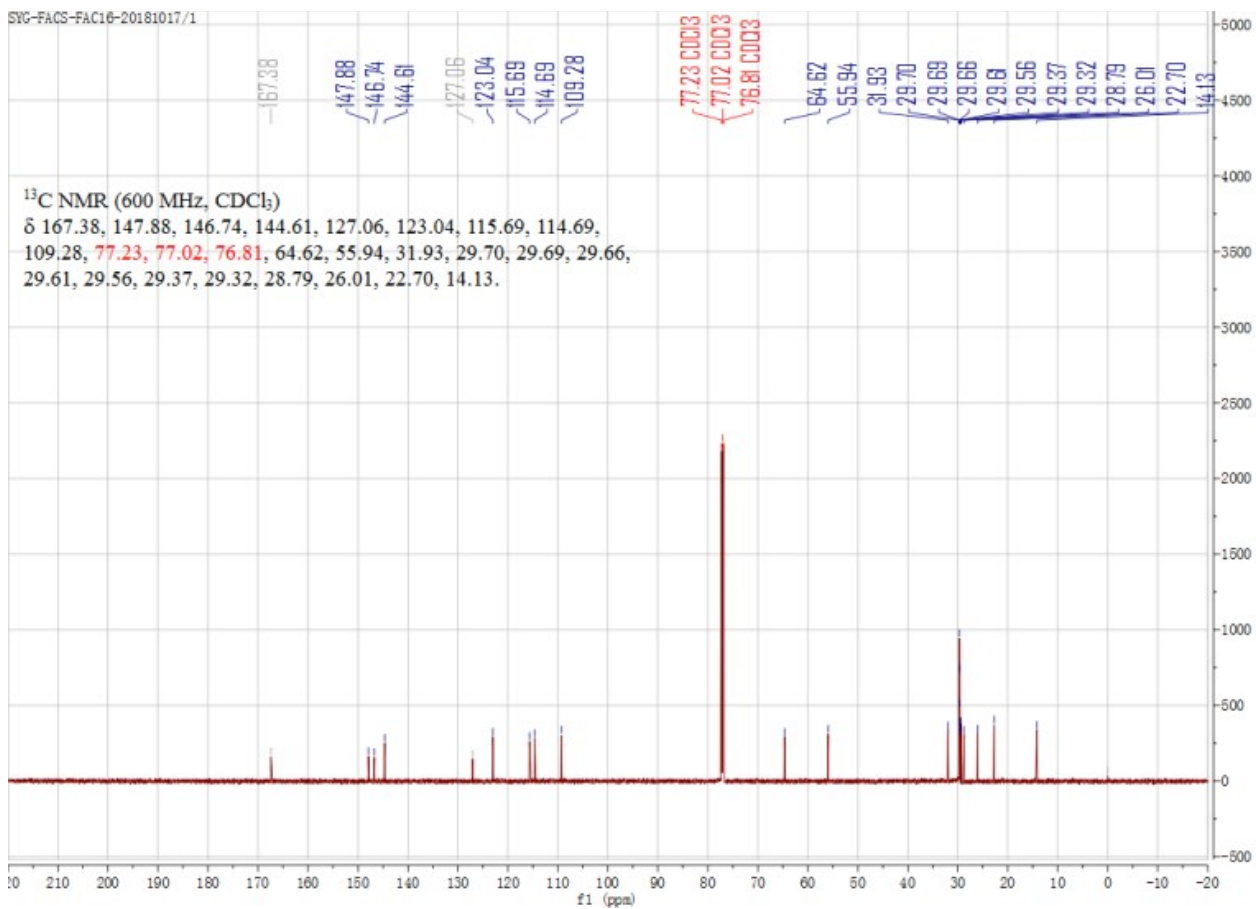

MS<sup>1</sup>(419.33)

FAC16 #145 RT: 0.44 AV: 1 NL: 2.79E2  
T: ITMS - p ESI Full ms [115.00-1000.00]

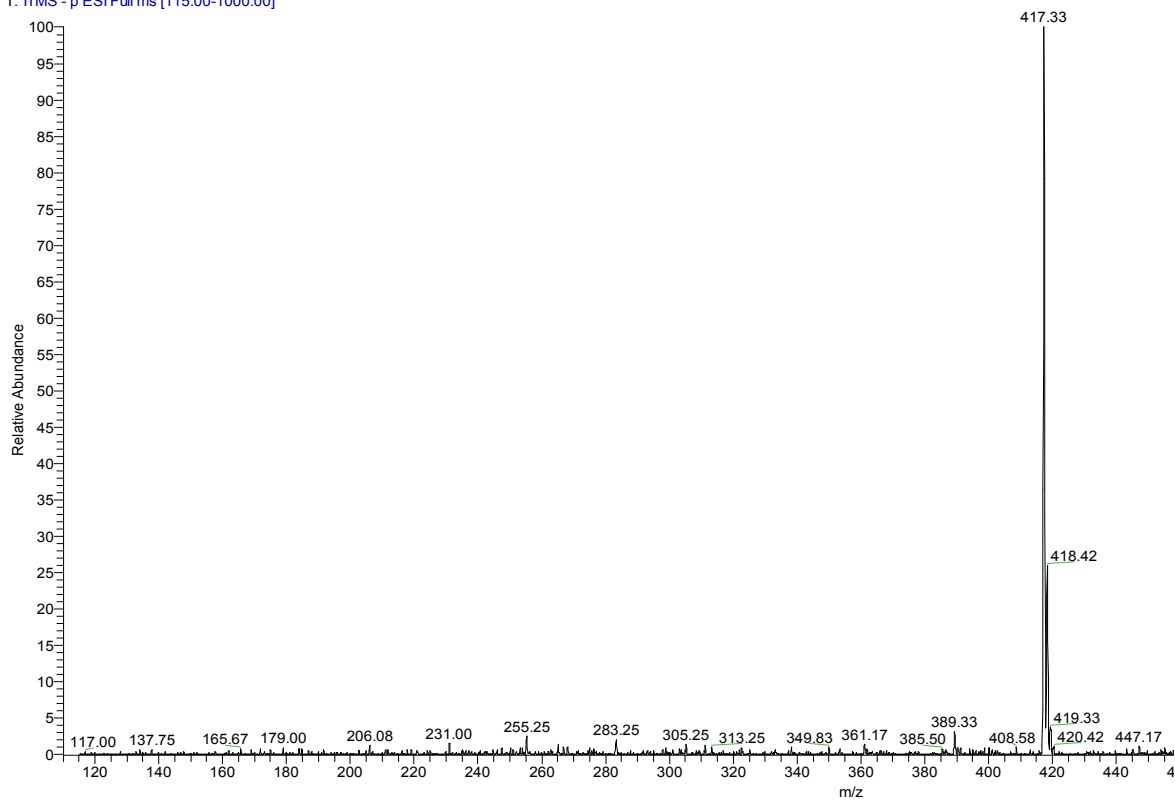

MS<sup>2</sup>

FAC16 #204 RT: 0.77 AV: 1 NL: 9.59  
T: ITMS - p ESI Full ms 3 417.00@cid30.00 402.00@cid35.00 [110.00-1000.00]

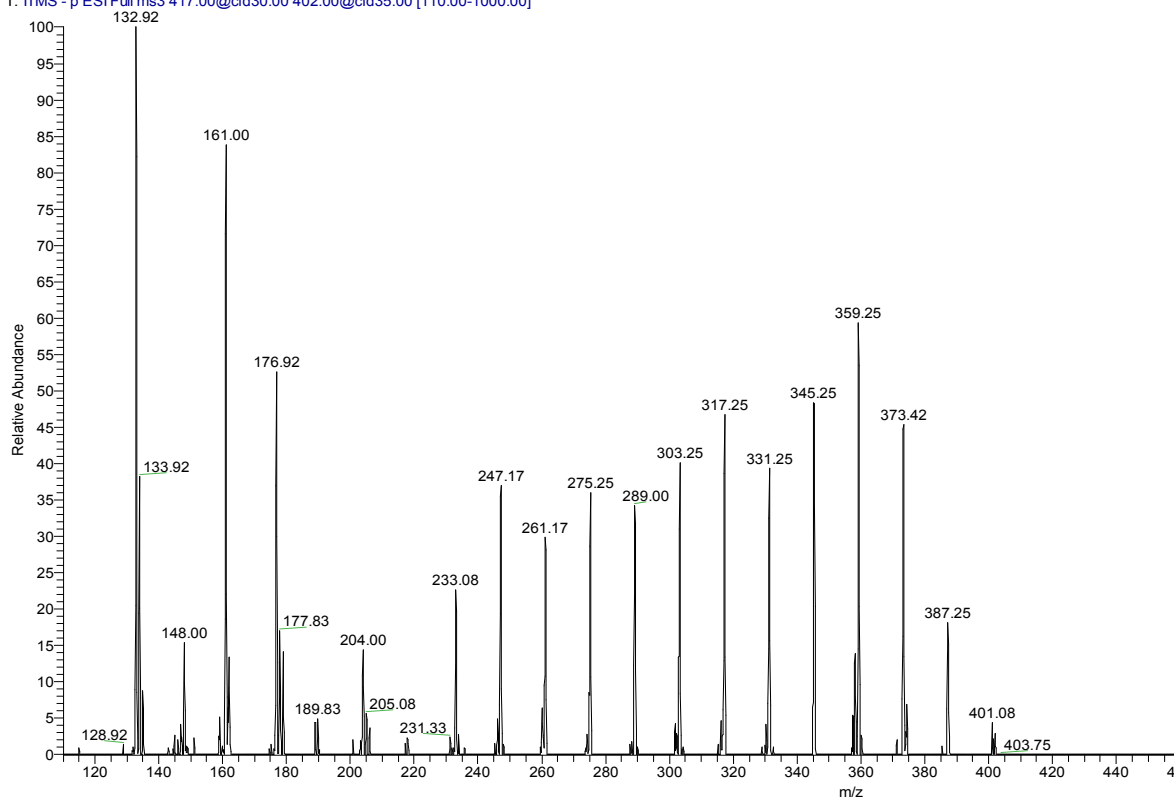

## FAC18

$^{13}\text{C}$  NMR (600 MHz,  $\text{CDCl}_3$ ): 167.37 (9-C=O), 147.87 (3-C-O- $\text{CH}_3$ ), 146.73 (4-C-OH), 144.60 (7-CH=CH), 127.07 (1-C), 123.04 (6-CH), 115.70 (8-C-C=O), 114.68 (5-CH), 109.27 (2-CH), 64.62 (1'-O- $\text{CH}_2$ ), 55.95 (10- $\text{CH}_3$ -O-Ar), 31.93 (2'- $\text{CH}_2$ ), 29.70 (3'- $\text{CH}_2$ ), 29.69 (4'- $\text{CH}_2$ ), 29.66 (5'- $\text{CH}_2$ ), 29.61, 28.56, 29.37, 29.32, 28.78, 26.01, 22.70 (6', 7', 8', 9', 10', 11', 12', 13', 14', 15', 16', 17'- $\text{CH}_2$ ), 14.12 (18'- $\text{CH}_3$ ).

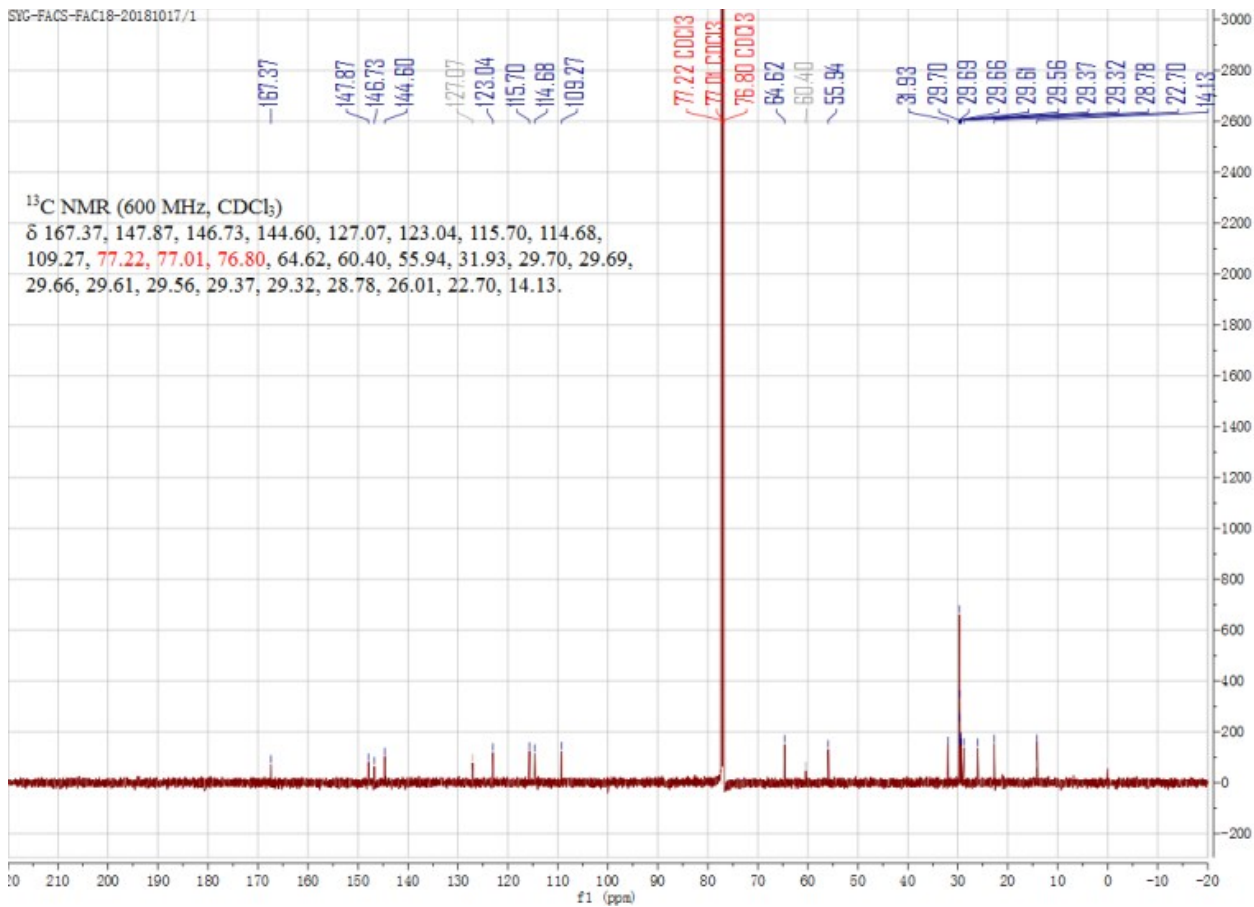

$\text{MS}^1(447.42)$

FAC18 #28 RT: 0.08 AV: 1 NL: 1.23E3  
T: ITMS - p ESI Full ms [110.00-1000.00]

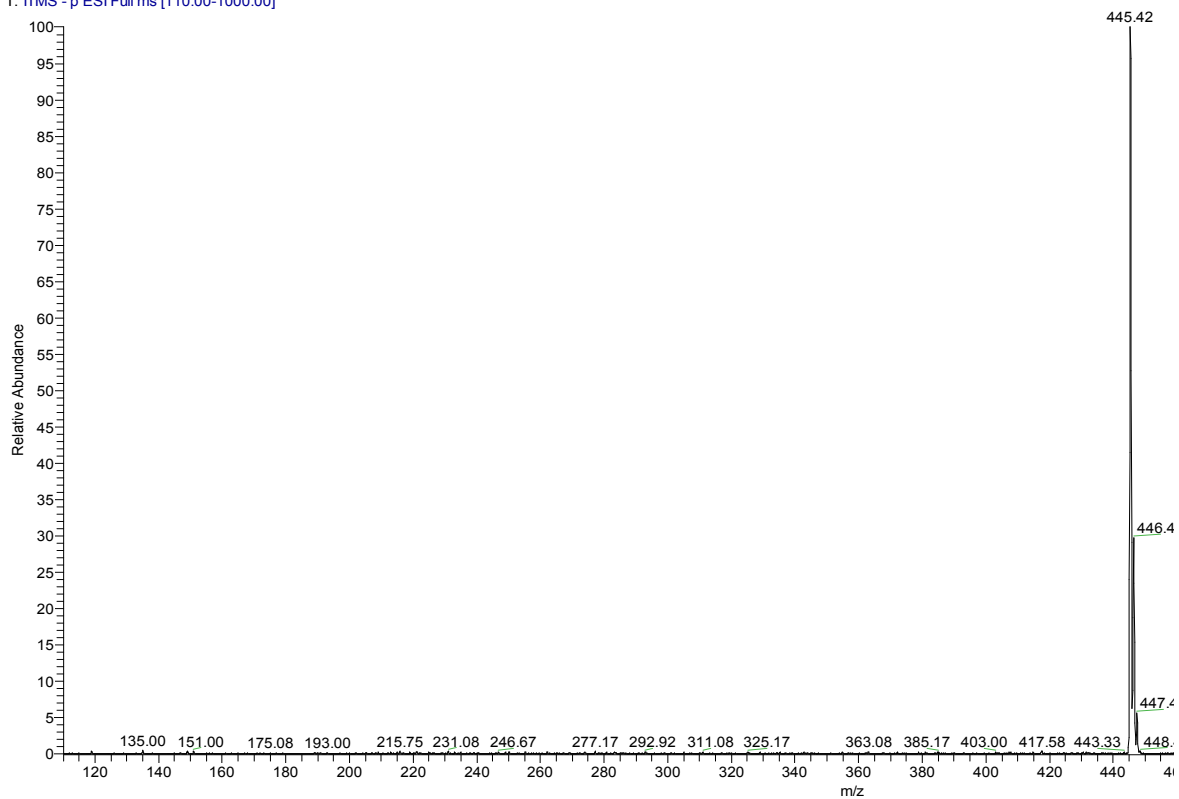

MS<sup>2</sup>

FAC18 #195 RT: 0.87 AV: 1 NL: 1.72  
T: ITMS + p ESI Full ms2 447.00@cid20.00 [120.00-1000.00]

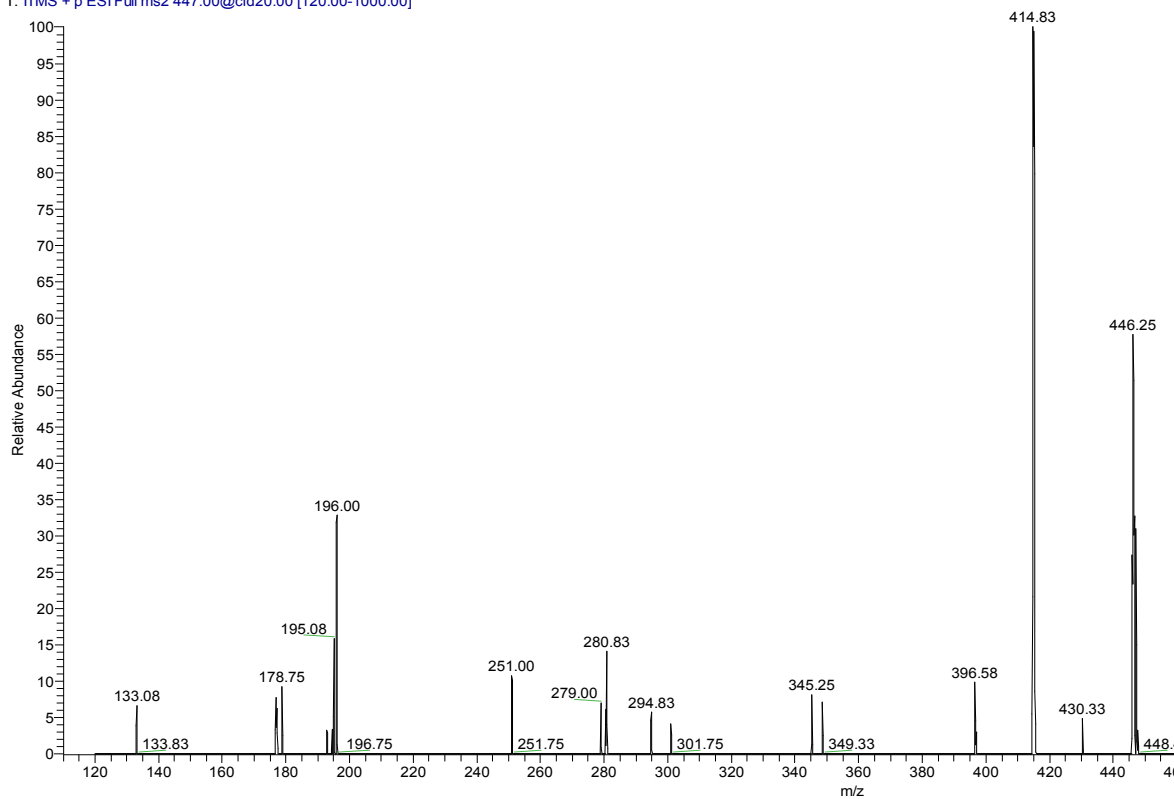

The purity of our products (FAEs) prepared in our laboratory can meet the requirements for the identification of their molecular structure through nuclear magnetic resonance (NMR). And the purity of FAEs is better than 98% (HPLC grade). More detailed data have been shown blow.

**FAC2 (100%, HPLC)**

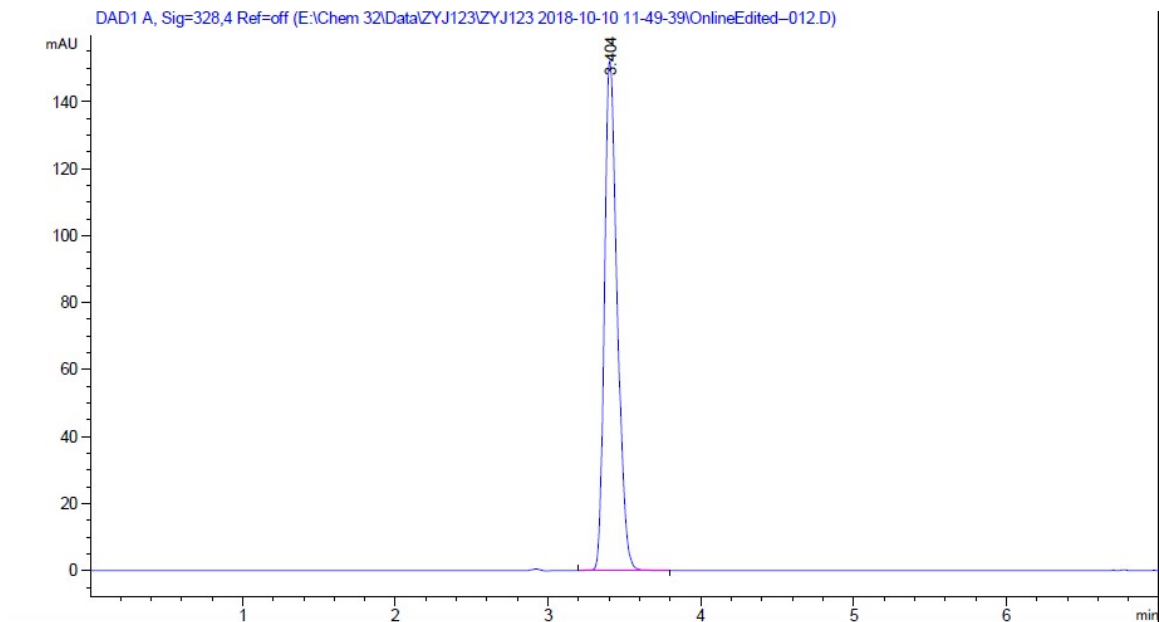

| 峰 # | 保留时间 [min] | 类型 | 峰宽 [min] | 峰面积 [mAU*s] | 峰高 [mAU]  | 峰面积 %    |
|-----|------------|----|----------|-------------|-----------|----------|
| 1   | 3.404      | BB | 0.0875   | 882.25348   | 152.45941 | 100.0000 |

### FAC4 (98.79%, HPLC)

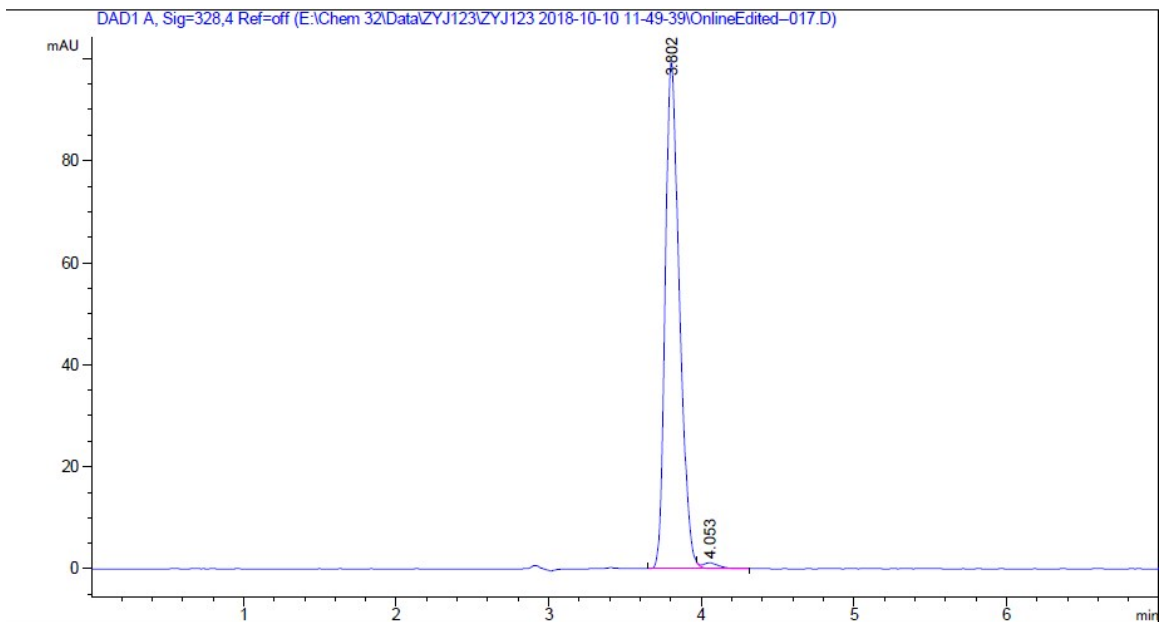



| Retention time |            |      | peak area |             |          |         |
|----------------|------------|------|-----------|-------------|----------|---------|
| 峰 #            | 保留时间 [min] | 类型   | 峰宽 [min]  | 峰面积 [mAU*s] | 峰高 [mAU] | 峰面积 %   |
| 1              | 3.802      | BV R | 0.0976    | 644.64685   | 99.52769 | 98.7954 |
| 2              | 4.053      | VB E | 0.1006    | 7.85981     | 1.13820  | 1.2046  |

### FAC6 (100%, HPLC)

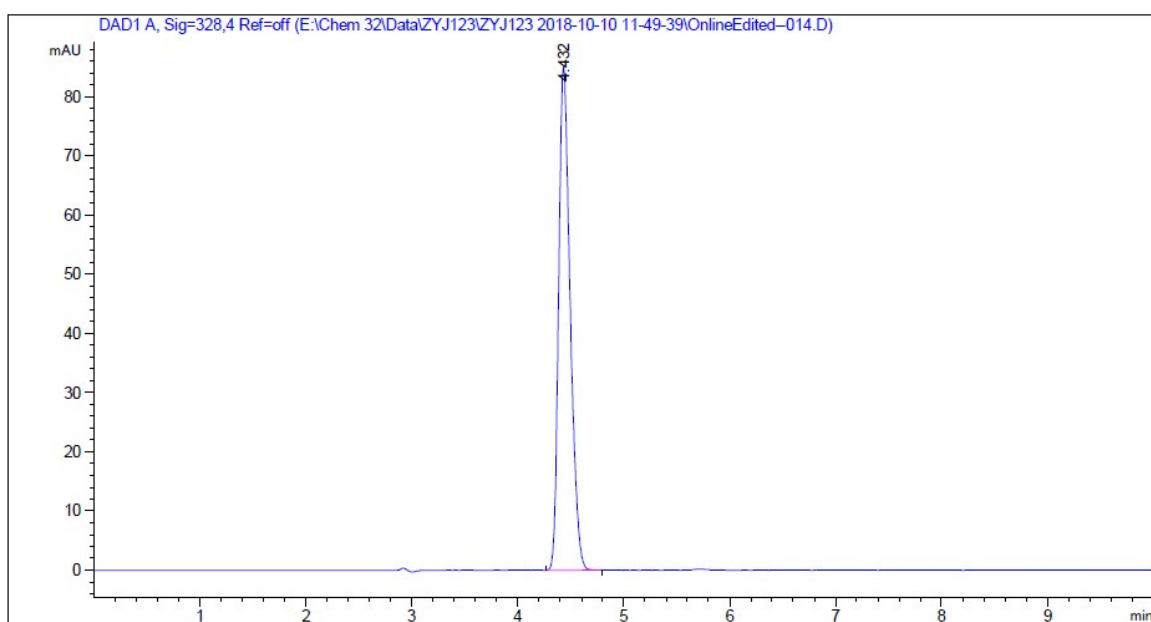

| Retention time |            |    | peak area |             |          |          |
|----------------|------------|----|-----------|-------------|----------|----------|
| 峰 #            | 保留时间 [min] | 类型 | 峰宽 [min]  | 峰面积 [mAU*s] | 峰高 [mAU] | 峰面积 %    |
| 1              | 4.432      | BB | 0.1137    | 640.10791   | 85.15678 | 100.0000 |

### FAC8 (100%, HPLC)

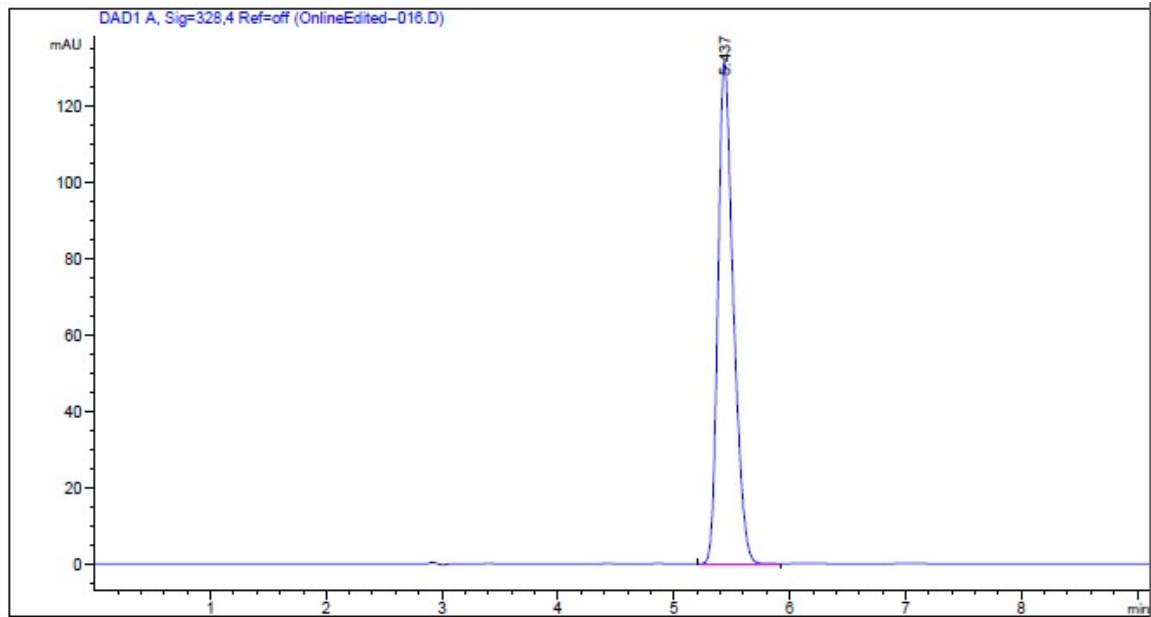

| 峰 # | 保留时间 [min] | 类型 | 峰宽 [min] | 峰面积 [mAU*s] | 峰高 [mAU]  | 峰面积 %    |
|-----|------------|----|----------|-------------|-----------|----------|
| 1   | 5.437      | BB | 0.1375   | 1213.82275  | 131.74413 | 100.0000 |

**FAC10 (100%, HPLC)**

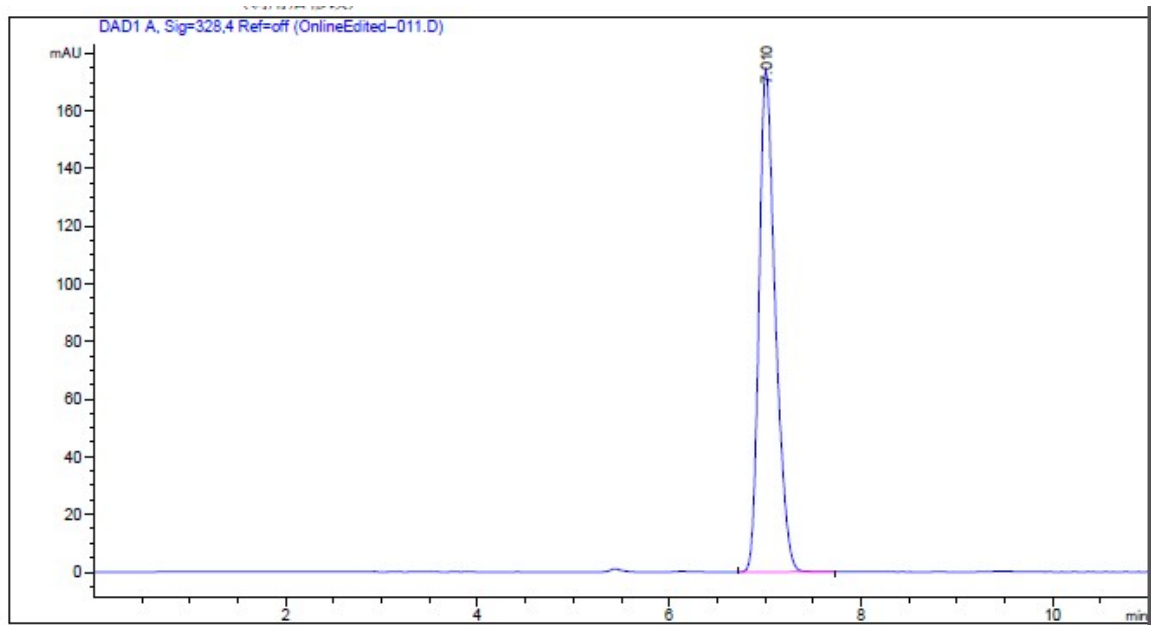

| Retention time |            | peak area |          |             |           |          |
|----------------|------------|-----------|----------|-------------|-----------|----------|
| 峰 #            | 保留时间 [min] | 类型        | 峰宽 [min] | 峰面积 [mAU*s] | 峰高 [mAU]  | 峰面积 %    |
| 1              | 7.010      | BB        | 0.1785   | 2067.90332  | 174.19380 | 100.0000 |

### FAC12 (100%, HPLC)

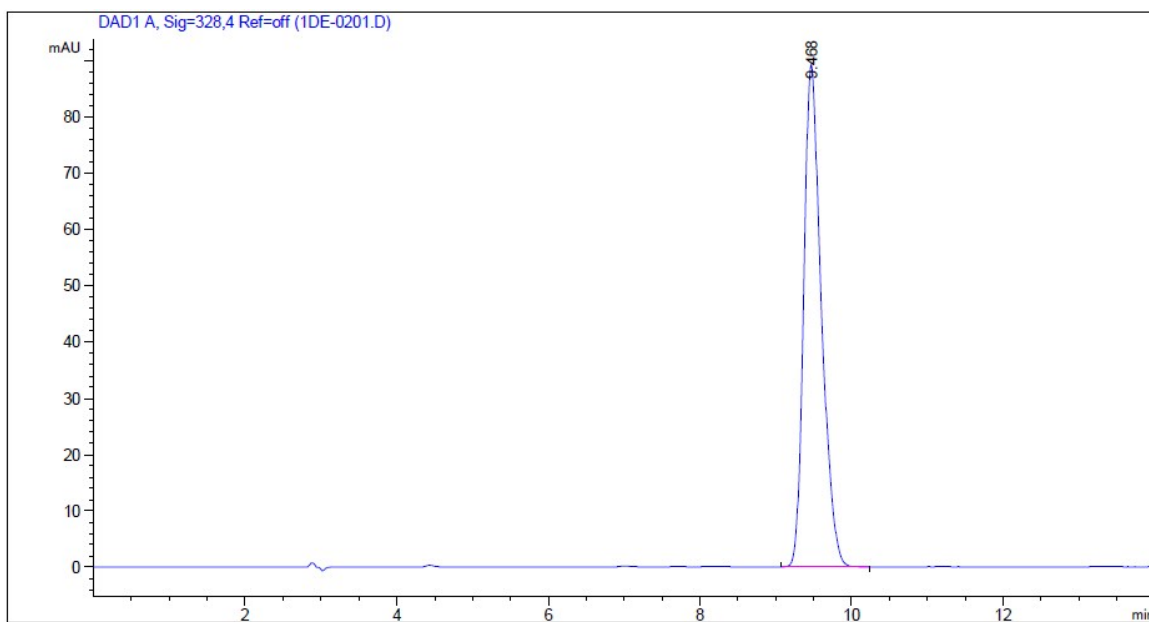

| Retention time |            | peak area |          |             |          |          |
|----------------|------------|-----------|----------|-------------|----------|----------|
| 峰 #            | 保留时间 [min] | 类型        | 峰宽 [min] | 峰面积 [mAU*s] | 峰高 [mAU] | 峰面积 %    |
| 1              | 9.468      | BB        | 0.2401   | 1439.49011  | 89.25983 | 100.0000 |

### FAC14 (100%, HPLC)

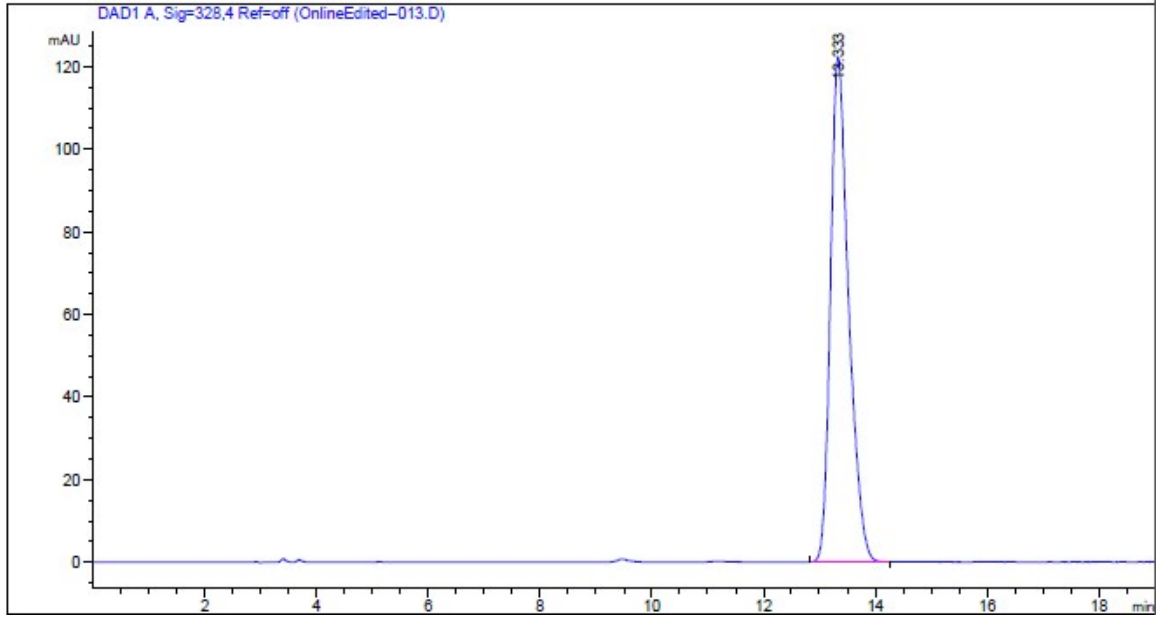

Retention time                      peak area

| 峰 # | 保留时间 [min] | 类型 | 峰宽 [min] | 峰面积 [mAU*s] | 峰高 [mAU]  | 峰面积 %    |
|-----|------------|----|----------|-------------|-----------|----------|
| 1   | 13.333     | BB | 0.3369   | 2753.63354  | 122.21925 | 100.0000 |

**FAC16 (95.8%, HPLC)**

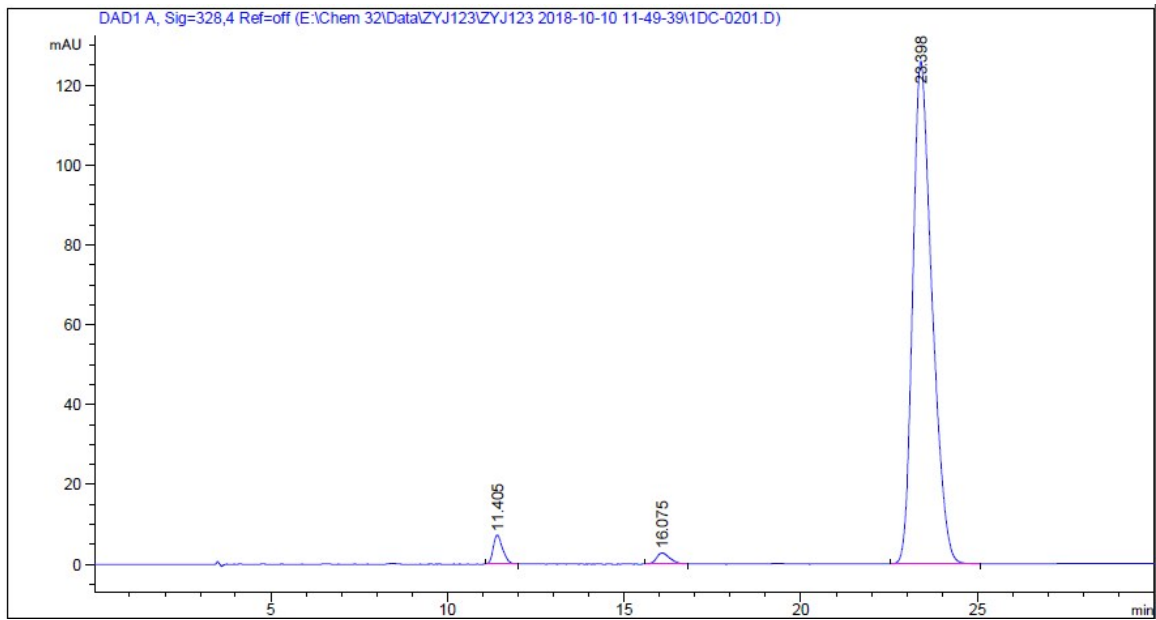

Retention time                      peak area

| 峰 # | 保留时间 [min] | 类型 | 峰宽 [min] | 峰面积 [mAU*s] | 峰高 [mAU]  | 峰面积 %   |
|-----|------------|----|----------|-------------|-----------|---------|
| 1   | 11.405     | BB | 0.2747   | 135.44350   | 7.29204   | 2.7107  |
| 2   | 16.075     | BB | 0.3768   | 74.09706    | 2.83594   | 1.4829  |
| 3   | 23.398     | BB | 0.5636   | 4787.11914  | 125.90565 | 95.8064 |

### FAC18 (99.8%, HPLC)

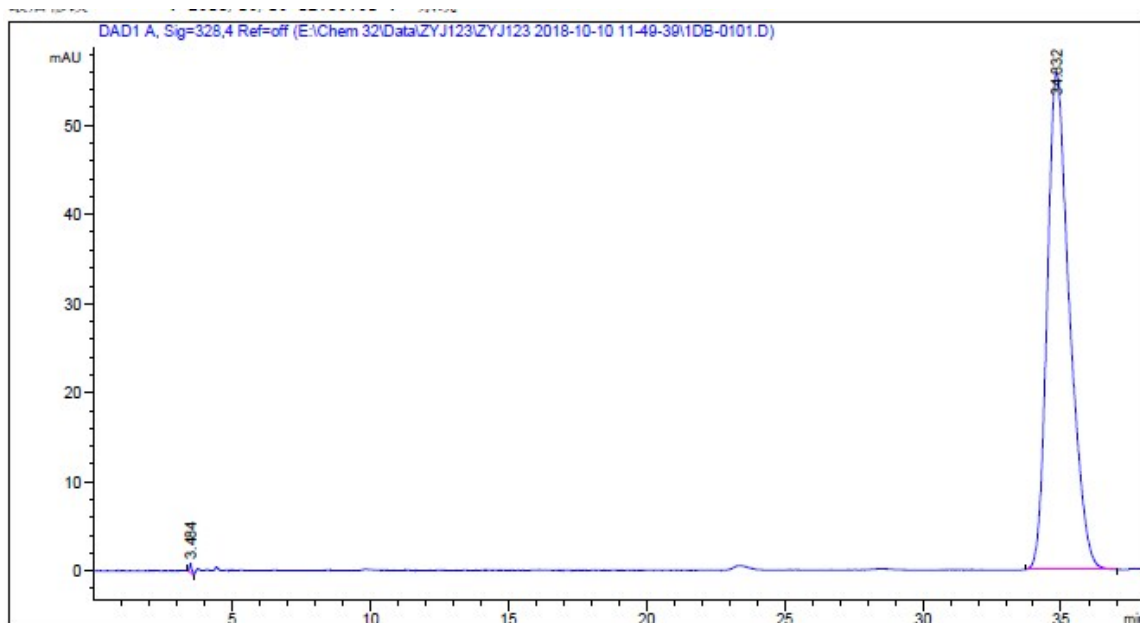

Retention time                      peak area

| 峰 # | 保留时间 [min] | 类型 | 峰宽 [min] | 峰面积 [mAU*s] | 峰高 [mAU] | 峰面积 %   |
|-----|------------|----|----------|-------------|----------|---------|
| 1   | 3.484      | BB | 0.0782   | 5.49889     | 1.03201  | 0.1755  |
| 2   | 34.832     | BB | 0.8254   | 3128.35864  | 55.68715 | 99.8245 |
